# Supplementary material
Source: PubMed Central journal article supplement (PMC3260497)

Supplementary Table 1. Characteristics of 16S amplicon data sets. Ex indicates the ex-plant lungs while PM indicates the post-mortem lungs.

| Section    | #Sequences | #Phyla | Chao1 |
|------------|------------|--------|-------|
| Ex RUL     | 33,509     | 7      | 111   |
| Ex RML     | 24,302     | 11     | 242   |
| Ex RLL     | 25,386     | 14     | 250   |
| Ex LUL     | 21,686     | 9      | 217   |
| Ex Ling    | 15,535     | 10     | 210   |
| Ex LLLA    | 25,650     | 13     | 217   |
| Ex LLLP    | 20,291     | 11     | 241   |
| PM RUL     | 15,524     | 4      | 33    |
| PM RML     | 22,564     | 5      | 46    |
| PM RLL     | 24,359     | 5      | 26    |
| PM LUL     | 10,640     | 5      | 40    |
| PM Ling    | 6,291      | 4      | 28    |
| PM LLL     | 21,752     | 5      | 31    |
| PM Trachea | 132,364    | 4      | 30    |

Supplementary Table 2. Complete listing of all OTUs identified by 16S rDNA sequences in the lung and tracheal samples. Ex indicates the ex-plant lungs while PM indicates the post-mortem lungs.

| Consensus Lineage                                                                                                                                 | Ex RUL | Ex RML | Ex RLL | Ex LUL | Ex Ling | Ex LLLA | Ex LLLP | PM RUL | PM RML | PM RLL | PM LUL | PM Ling |
|---------------------------------------------------------------------------------------------------------------------------------------------------|--------|--------|--------|--------|---------|---------|---------|--------|--------|--------|--------|---------|
| k__Bacteria;p__Acidobacteria;c__o__f__g__s__                                                                                                      | 0      | 0      | 0      | 0      | 0       | 0       | 11      | 0      | 12     | 19     | 0      | 0       |
| k__Bacteria;p__Acidobacteria;c__BPC102;o__f__g__s__                                                                                               | 0      | 0      | 0      | 0      | 0       | 0       | 4       | 0      | 0      | 0      | 0      | 0       |
| k__Bacteria;p__Actinobacteria;c__Actinobacteria;o__Acidimicrobiales;f__CL500-29;g__s__                                                            | 0      | 0      | 0      | 0      | 0       | 0       | 0       | 0      | 8      | 10     | 0      | 0       |
| k__Bacteria;p__Actinobacteria;c__Actinobacteria;o__Acidimicrobiales;f__CL500-29;g__s__                                                            | 0      | 0      | 0      | 0      | 0       | 0       | 0       | 0      | 0      | 0      | 0      | 7       |
| k__Bacteria;p__Actinobacteria;c__Actinobacteria;o__Actinomycetales;f__Actinomycetaceae;g__Actinomyces;s__                                         | 0      | 0      | 0      | 0      | 0       | 0       | 0       | 0      | 0      | 6      | 0      | 0       |
| k__Bacteria;p__Actinobacteria;c__Actinobacteria;o__Actinomycetales;f__Actinomycetaceae;g__Actinomyces;s__                                         | 0      | 0      | 0      | 0      | 0       | 0       | 0       | 0      | 0      | 0      | 5      | 0       |
| k__Bacteria;p__Actinobacteria;c__Actinobacteria;o__Actinomycetales;f__Actinomycetaceae;g__Actinomyces;s__Actinomycesoris5                         | 0      | 0      | 6      | 0      | 0       | 0       | 0       | 0      | 0      | 0      | 0      | 1       |
| k__Bacteria;p__Actinobacteria;c__Actinobacteria;o__Actinomycetales;f__Actinomycetaceae;g__Actinomyces;s__Actinomycesoris0                         | 0      | 0      | 0      | 0      | 0       | 1       | 0       | 0      | 24     | 0      | 0      | 0       |
| k__Bacteria;p__Actinobacteria;c__Actinobacteria;o__Actinomycetales;f__Brevibacteriaceae;g__Brevibacterium;s__Brevibacteriumsauguinis              | 3      | 0      | 7      | 5      | 4       | 7       | 0       | 0      | 0      | 0      | 0      | 0       |
| k__Bacteria;p__Actinobacteria;c__Actinobacteria;o__Actinomycetales;f__Corynebacteriaceae;g__Corynebacterium;s__                                   | 0      | 1      | 1      | 7      | 0       | 0       | 7       | 0      | 0      | 1      | 1      | 2       |
| k__Bacteria;p__Actinobacteria;c__Actinobacteria;o__Actinomycetales;f__Corynebacteriaceae;g__Corynebacterium;s__                                   | 0      | 0      | 0      | 0      | 0       | 0       | 0       | 0      | 0      | 0      | 14     | 0       |
| k__Bacteria;p__Actinobacteria;c__Actinobacteria;o__Actinomycetales;f__Corynebacteriaceae;g__Corynebacterium;s__Corynebacteriumaurimucosum         | 0      | 0      | 0      | 0      | 0       | 0       | 0       | 0      | 0      | 0      | 0      | 0       |
| k__Bacteria;p__Actinobacteria;c__Actinobacteria;o__Actinomycetales;f__Corynebacteriaceae;g__Corynebacterium;s__Corynebacteriumtuberculoostearicum | 3      | 14     | 6      | 8      | 6       | 9       | 8       | 7      | 0      | 0      | 0      | 0       |
| k__Bacteria;p__Actinobacteria;c__Actinobacteria;o__Actinomycetales;f__Dietziaceae;g__Dietzia;s__Dietziamaris                                      | 3      | 0      | 11     | 3      | 0       | 0       | 0       | 0      | 0      | 0      | 6      | 12      |
| k__Bacteria;p__Actinobacteria;c__Actinobacteria;o__Actinomycetales;f__Microbacteriaceae;g__Microbacterium;s__                                     | 0      | 4      | 7      | 0      | 0       | 0       | 0       | 0      | 0      | 0      | 0      | 0       |
| k__Bacteria;p__Actinobacteria;c__Actinobacteria;o__Actinomycetales;f__Microbacteriaceae;g__Microbacterium;s__                                     | 0      | 0      | 0      | 0      | 0       | 0       | 0       | 0      | 6      | 0      | 0      | 3       |

|                                                                                                                                     |     |     |     |     |     |     |     |     |    |    |    |    |    |
|-------------------------------------------------------------------------------------------------------------------------------------|-----|-----|-----|-----|-----|-----|-----|-----|----|----|----|----|----|
| k_Bacteria;p_Actinobacteria;c_Actinobacteria;o_Actinomycetales;f_Microbacteriaceae;g_Microbacterium;s_                              | 0   | 2   | 1   | 0   | 0   | 0   | 0   | 0   | 0  | 0  | 0  | 0  | 0  |
|                                                                                                                                     | 0   | 0   | 0   | 0   | 0   | 0   | 5   | 0   | 0  | 0  | 0  | 0  | 0  |
| k_Bacteria;p_Actinobacteria;c_Actinobacteria;o_Actinomycetales;f_Microbacteriaceae;g_Microbacterium;s_Microbacteriumginsengisoli    | 10  | 1   | 0   | 0   | 9   | 0   | 0   | 0   | 0  | 0  | 0  | 0  | 0  |
|                                                                                                                                     | 0   |     |     |     |     |     |     |     |    |    |    |    |    |
| k_Bacteria;p_Actinobacteria;c_Actinobacteria;o_Actinomycetales;f_Microbacteriaceae;g_Salinibacterium;s_                             | 0   | 15  | 0   | 0   | 0   | 0   | 0   | 0   | 0  | 0  | 0  | 0  | 0  |
|                                                                                                                                     | 0   | 0   | 0   | 0   | 0   | 0   | 0   | 0   | 0  | 0  | 0  | 8  | 0  |
| k_Bacteria;p_Actinobacteria;c_Actinobacteria;o_Actinomycetales;f_Micrococcaceae;g_Arthrobacter;s_                                   | 0   | 0   | 0   | 0   | 0   | 0   | 0   | 0   | 0  | 0  | 0  | 0  | 0  |
|                                                                                                                                     | 0   | 0   | 0   | 0   | 0   | 0   | 0   | 0   | 0  | 0  | 12 | 1  | 0  |
| k_Bacteria;p_Actinobacteria;c_Actinobacteria;o_Actinomycetales;f_Micrococcaceae;g_Arthrobacter;s_Arthrobactersulfureus              | 3   | 0   | 21  | 0   | 0   | 0   | 0   | 0   | 0  | 0  | 0  | 0  | 0  |
|                                                                                                                                     | 0   | 0   | 0   | 0   | 0   | 0   | 0   | 0   | 0  | 0  | 0  | 3  | 8  |
| k_Bacteria;p_Actinobacteria;c_Actinobacteria;o_Actinomycetales;f_Micrococcaceae;g_Kocuria;s_Kocuriapalustris                        | 0   | 0   | 8   | 6   | 0   | 0   | 0   | 0   | 0  | 0  | 0  | 0  | 0  |
|                                                                                                                                     | 0   | 1   | 10  | 8   | 0   | 0   | 0   | 0   | 0  | 0  | 0  | 15 | 0  |
| k_Bacteria;p_Actinobacteria;c_Actinobacteria;o_Actinomycetales;f_Micrococcaceae;g_Micrococcus;s_                                    | 0   | 0   | 0   | 0   | 0   | 0   | 0   | 0   | 0  | 0  | 0  | 0  | 10 |
|                                                                                                                                     | 0   | 0   | 0   | 0   | 0   | 0   | 0   | 0   | 15 | 0  | 0  | 0  | 0  |
| k_Bacteria;p_Actinobacteria;c_Actinobacteria;o_Actinomycetales;f_Micrococcaceae;g_Nesterenkonia;s_                                  | 0   | 0   | 0   | 0   | 0   | 0   | 0   | 0   | 0  | 0  | 0  | 0  | 0  |
|                                                                                                                                     | 8   | 7   | 0   | 0   | 0   | 0   | 0   | 0   | 0  | 0  | 0  | 0  | 2  |
| k_Bacteria;p_Actinobacteria;c_Actinobacteria;o_Actinomycetales;f_Mycobacteriaceae;g_Mycobacterium;s_                                | 3   | 0   | 0   | 2   | 0   | 0   | 0   | 0   | 0  | 0  | 0  | 1  | 10 |
|                                                                                                                                     | 0   | 0   | 0   | 0   | 0   | 0   | 0   | 0   | 0  | 0  | 0  | 0  | 0  |
| k_Bacteria;p_Actinobacteria;c_Actinobacteria;o_Actinomycetales;f_Nocardioidaceae;g_Nocardioides;s_                                  | 0   | 0   | 0   | 0   | 0   | 0   | 0   | 0   | 0  | 0  | 0  | 10 | 0  |
|                                                                                                                                     | 206 | 220 | 324 | 241 | 119 | 238 | 236 | 103 | 0  | 68 | 55 | 74 | 22 |
| k_Bacteria;p_Actinobacteria;c_Actinobacteria;o_Actinomycetales;f_Propionibacteriaceae;g_Propionibacterium;s_Propionibacteriummacnes | 13  |     |     |     |     |     |     |     |    |    |    |    |    |
|                                                                                                                                     | 0   | 0   | 2   | 0   | 0   | 3   | 9   | 0   | 0  | 0  | 0  | 0  | 0  |
|                                                                                                                                     | 0   |     |     |     |     |     |     |     |    |    |    |    |    |
| k_Bacteria;p_Actinobacteria;c_Actinobacteria;o_Actinomycetales;f_Pseudonocardiaceae;g_Actinomycetospora;s_                          | 0   | 0   | 0   | 0   | 0   | 0   | 0   | 0   | 0  | 0  | 2  | 0  | 0  |
|                                                                                                                                     | 0   | 0   | 0   | 0   | 0   | 0   | 0   | 1   | 9  | 0  | 5  | 7  | 0  |
| k_Bacteria;p_Actinobacteria;c_Actinobacteria;o_koll13;f_g_s_                                                                        | 0   | 0   | 0   | 0   | 0   | 0   | 0   | 0   | 0  | 6  | 0  | 0  | 0  |
|                                                                                                                                     | 0   | 0   | 0   | 0   | 0   | 0   | 0   | 0   | 0  | 0  | 0  | 0  | 0  |
| k_Bacteria;p_Actinobacteria;c_Actinobacteria;o_koll13;f_g_s_                                                                        | 0   | 0   | 0   | 0   | 0   | 0   | 0   | 4   | 0  | 0  | 0  | 0  | 0  |
|                                                                                                                                     | 0   | 0   | 0   | 0   | 0   | 0   | 0   | 0   | 0  | 0  | 0  | 0  | 0  |
| k_Bacteria;p_Actinobacteria;c_Actinobacteria;o_koll13;f_g_s_                                                                        | 0   | 0   | 0   | 26  | 0   | 0   | 0   | 0   | 0  | 0  | 0  | 0  | 0  |
|                                                                                                                                     | 1   | 0   | 0   | 0   | 0   | 0   | 0   | 0   | 0  | 0  | 1  | 0  | 1  |
| k_Bacteria;p_Actinobacteria;c_Actinobacteria;o_Solirubrobacterales;f_g_s_                                                           | 0   | 0   | 0   | 0   | 0   | 0   | 0   | 0   | 0  | 0  | 0  | 0  | 0  |
|                                                                                                                                     | 0   | 0   | 0   | 0   | 0   | 3   | 0   | 0   | 0  | 0  | 0  | 0  | 0  |
| k_Bacteria;p_Actinobacteria;c_Actinobacteria;o_Solirubrobacterales;f_Solirubrobacteraceae;g_Solirubrobacter;s_                      | 0   | 0   | 0   | 0   | 0   | 0   | 0   | 0   | 0  | 0  | 0  | 0  | 0  |
|                                                                                                                                     | 0   | 0   | 0   | 0   | 0   | 0   | 0   | 4   | 6  | 4  | 0  | 0  | 0  |
| k_Bacteria;p_Bacteroidetes;c_o_f_g_s_                                                                                               | 0   | 0   | 0   | 0   | 0   | 0   | 0   | 0   | 0  | 5  | 0  | 0  | 0  |
|                                                                                                                                     | 0   | 0   | 0   | 0   | 0   | 0   | 0   | 0   | 0  | 0  | 0  | 0  | 0  |
| k_Bacteria;p_Bacteroidetes;c_o_f_g_s_                                                                                               | 0   | 0   | 0   | 0   | 0   | 0   | 0   | 2   | 0  | 0  | 0  | 0  | 0  |
|                                                                                                                                     | 0   | 0   | 0   | 0   | 0   | 0   | 0   | 0   | 0  | 0  | 0  | 0  | 0  |
| k_Bacteria;p_Bacteroidetes;c_Bacteroidia;o_Bacteroidales;f_g_s_                                                                     | 0   | 0   | 0   | 0   | 0   | 0   | 0   | 4   | 0  | 0  | 1  | 0  | 0  |
|                                                                                                                                     | 0   | 0   | 0   | 0   | 0   | 0   | 0   | 0   | 0  | 0  | 0  | 0  | 0  |
| k_Bacteria;p_Bacteroidetes;c_Bacteroidia;o_Bacteroidales;f_g_s_                                                                     | 0   | 0   | 0   | 0   | 0   | 0   | 0   | 7   | 0  | 0  | 0  | 0  | 0  |
|                                                                                                                                     | 0   | 0   | 0   | 0   | 0   | 0   | 0   | 0   | 0  | 0  | 0  | 0  | 0  |
| k_Bacteria;p_Bacteroidetes;c_Bacteroidia;o_Bacteroidales;f_Prevotellaceae;g_Prevotella;s_                                           | 0   | 0   | 0   | 0   | 0   | 0   | 0   | 0   | 0  | 0  | 2  | 0  | 0  |
|                                                                                                                                     | 0   | 0   | 0   | 0   | 0   | 0   | 0   | 0   | 0  | 0  | 0  | 0  | 0  |
| k_Bacteria;p_Bacteroidetes;c_Bacteroidia;o_Bacteroidales;f_Prevotellaceae;g_Prevotella;s_                                           | 0   | 0   | 0   | 0   | 0   | 0   | 0   | 0   | 0  | 0  | 0  | 0  | 0  |
|                                                                                                                                     | 0   | 0   | 0   | 0   | 0   | 0   | 0   | 8   | 0  | 0  | 98 | 0  | 0  |
| k_Bacteria;p_Bacteroidetes;c_Flavobacteria;o_f_g_s_                                                                                 | 0   | 0   | 0   | 0   | 0   | 0   | 0   | 0   | 0  | 0  | 0  | 0  | 0  |
|                                                                                                                                     | 0   | 0   | 0   | 0   | 0   | 0   | 0   | 2   | 0  | 0  | 0  | 0  | 0  |
| k_Bacteria;p_Bacteroidetes;c_Flavobacteria;o_f_g_s_                                                                                 | 0   | 0   | 0   | 0   | 0   | 0   | 0   | 0   | 0  | 0  | 0  | 0  | 0  |
|                                                                                                                                     | 0   | 0   | 0   | 0   | 0   | 6   | 0   | 0   | 0  | 0  | 0  | 0  | 0  |
| k_Bacteria;p_Bacteroidetes;c_Flavobacteria;o_f_g_s_                                                                                 | 0   | 0   | 0   | 0   | 0   | 0   | 0   | 0   | 0  | 0  | 6  | 0  | 0  |
|                                                                                                                                     | 0   | 0   | 0   | 0   | 0   | 0   | 0   | 0   | 0  | 0  | 0  | 0  | 0  |
| k_Bacteria;p_Bacteroidetes;c_Flavobacteria;o_f_g_s_                                                                                 | 0   | 0   | 0   | 0   | 0   | 0   | 8   | 0   | 0  | 0  | 0  | 0  | 0  |
|                                                                                                                                     | 0   | 0   | 0   | 0   | 0   | 0   | 0   | 0   | 0  | 0  | 0  | 0  | 0  |
| k_Bacteria;p_Bacteroidetes;c_Flavobacteria;o_Flavobacteriales;f_Cryomorphaceae;g_s_                                                 | 0   | 0   | 0   | 0   | 0   | 0   | 0   | 5   | 0  | 0  | 0  | 2  | 0  |



|                                                                                                         |    |    |    |   |   |   |   |   |   |   |    |    |     |    |    |    |    |   |   |   |    |    |
|---------------------------------------------------------------------------------------------------------|----|----|----|---|---|---|---|---|---|---|----|----|-----|----|----|----|----|---|---|---|----|----|
| 1                                                                                                       | 0  | 0  | 10 | 0 | 0 | 0 | 0 | 0 | 0 | 0 | 0  | 0  | 0   | 0  | 0  | 0  | 0  | 0 | 0 | 0 | 0  | 0  |
| k_Bacteria;p_Bacteroidetes;c_Flavobacteria;o_Flavobacteriales;f_Flavobacteriaceae;g_Maribacter;s_       | 0  | 0  | 5  | 0 | 0 | 0 | 0 | 0 | 0 | 0 | 0  | 0  | 0   | 0  | 0  | 0  | 0  | 0 | 0 | 0 | 0  | 0  |
| k_Bacteria;p_Bacteroidetes;c_Flavobacteria;o_Flavobacteriales;f_Flavobacteriaceae;g_Psychroserpens;s_   | 0  | 0  | 0  | 0 | 0 | 0 | 0 | 0 | 0 | 0 | 0  | 0  | 0   | 0  | 0  | 0  | 0  | 0 | 0 | 0 | 0  | 5  |
| k_Bacteria;p_Bacteroidetes;c_Sphingobacteria;o_Sphingobacteriales;f_g_s_                                | 2  | 0  | 0  | 0 | 0 | 0 | 0 | 0 | 0 | 5 | 0  | 0  | 0   | 0  | 0  | 0  | 0  | 0 | 0 | 0 | 0  | 9  |
| k_Bacteria;p_Bacteroidetes;c_Sphingobacteria;o_Sphingobacteriales;f_g_s_                                | 3  | 0  | 0  | 0 | 0 | 0 | 0 | 0 | 0 | 0 | 0  | 0  | 0   | 0  | 0  | 0  | 0  | 0 | 0 | 0 | 0  | 0  |
| k_Bacteria;p_Bacteroidetes;c_Sphingobacteria;o_Sphingobacteriales;f_g_s_                                | 0  | 14 | 0  | 0 | 0 | 0 | 0 | 0 | 0 | 0 | 0  | 0  | 0   | 0  | 0  | 0  | 0  | 0 | 0 | 0 | 0  | 0  |
| k_Bacteria;p_Bacteroidetes;c_Sphingobacteria;o_Sphingobacteriales;f_Flammeovirgaceae;g_s_               | 0  | 0  | 0  | 0 | 0 | 0 | 0 | 0 | 0 | 0 | 0  | 0  | 0   | 0  | 0  | 0  | 0  | 0 | 0 | 0 | 4  | 0  |
| k_Bacteria;p_Bacteroidetes;c_Sphingobacteria;o_Sphingobacteriales;f_Flammeovirgaceae;g_Fulvivirga;s_    | 1  | 0  | 0  | 2 | 0 | 0 | 0 | 0 | 0 | 0 | 0  | 0  | 0   | 0  | 0  | 0  | 0  | 0 | 0 | 0 | 0  | 2  |
| k_Bacteria;p_Bacteroidetes;c_Sphingobacteria;o_Sphingobacteriales;f_Flexibacteraceae;g_s_               | 0  | 0  | 0  | 0 | 0 | 0 | 0 | 0 | 0 | 0 | 0  | 0  | 0   | 0  | 0  | 0  | 0  | 0 | 0 | 0 | 4  | 0  |
| k_Bacteria;p_Bacteroidetes;c_Sphingobacteria;o_Sphingobacteriales;f_Saprospiraceae;g_s_                 | 0  | 4  | 0  | 0 | 0 | 0 | 0 | 0 | 0 | 0 | 0  | 0  | 0   | 0  | 0  | 0  | 0  | 0 | 0 | 0 | 0  | 6  |
| k_Bacteria;p_Bacteroidetes;c_Sphingobacteria;o_Sphingobacteriales;f_Saprospiraceae;g_s_                 | 0  | 0  | 2  | 0 | 0 | 0 | 0 | 0 | 0 | 0 | 0  | 0  | 0   | 0  | 0  | 0  | 0  | 0 | 0 | 0 | 0  | 0  |
| k_Bacteria;p_Bacteroidetes;c_Sphingobacteria;o_Sphingobacteriales;f_Saprospiraceae;g_Lewinella;s_       | 0  | 0  | 0  | 0 | 0 | 0 | 0 | 0 | 0 | 0 | 0  | 0  | 0   | 0  | 0  | 0  | 0  | 0 | 0 | 0 | 0  | 16 |
| k_Bacteria;p_Bacteroidetes;c_Sphingobacteria;o_Sphingobacteriales;f_Sphingobacteriaceae;g_Pedobacter;s_ | 0  | 1  | 0  | 2 | 0 | 0 | 0 | 0 | 0 | 0 | 0  | 0  | 0   | 0  | 0  | 0  | 0  | 0 | 0 | 0 | 8  | 1  |
| k_Bacteria;p_Chlorobi;c_Chlorobia;o_Chlorobiales;f_Chlorobiaceae;g_Prosthecochloris;s_                  | 3  | 15 | 4  | 0 | 0 | 0 | 0 | 0 | 0 | 0 | 0  | 0  | 0   | 0  | 0  | 0  | 0  | 0 | 0 | 0 | 1  | 13 |
| k_Bacteria;p_Chloroflexi;c_Anaerolineae;o_A4b;f_g_s_                                                    | 0  | 0  | 0  | 0 | 0 | 0 | 0 | 0 | 0 | 0 | 5  | 0  | 0   | 0  | 0  | 0  | 0  | 0 | 0 | 0 | 0  | 0  |
| k_Bacteria;p_Chloroflexi;c_Anaerolineae;o_A4b;f_g_s_                                                    | 0  | 0  | 0  | 0 | 0 | 0 | 0 | 0 | 0 | 0 | 6  | 0  | 0   | 0  | 0  | 0  | 0  | 0 | 0 | 0 | 0  | 0  |
| k_Bacteria;p_Chloroflexi;c_Anaerolineae;o_Anaerolineales;f_Anaerolinaceae;g_WCHB1-05;s_                 | 0  | 4  | 0  | 0 | 0 | 0 | 0 | 0 | 0 | 0 | 0  | 0  | 0   | 0  | 0  | 0  | 0  | 0 | 0 | 0 | 0  | 0  |
| k_Bacteria;p_Chloroflexi;c_Anaerolineae;o_Caldilineales;f_Caldilineaceae;g_Caldilinea;s_                | 0  | 7  | 0  | 0 | 0 | 0 | 0 | 0 | 0 | 0 | 0  | 0  | 0   | 0  | 0  | 0  | 0  | 0 | 0 | 0 | 0  | 0  |
| k_Bacteria;p_Chloroflexi;c_Anaerolineae;o_DRC31;f_g_s_                                                  | 0  | 0  | 0  | 0 | 0 | 0 | 0 | 0 | 0 | 0 | 0  | 2  | 4   | 0  | 0  | 0  | 0  | 0 | 0 | 0 | 3  | 7  |
| k_Bacteria;p_Chloroflexi;c_Anaerolineae;o_DRC31;f_g_s_                                                  | 0  | 0  | 0  | 0 | 0 | 0 | 0 | 0 | 0 | 0 | 6  | 0  | 0   | 0  | 0  | 0  | 0  | 0 | 0 | 0 | 0  | 0  |
| k_Bacteria;p_Chloroflexi;c_Anaerolineae;o_GCA004;f_g_s_                                                 | 0  | 0  | 0  | 0 | 0 | 0 | 0 | 0 | 0 | 0 | 8  | 0  | 0   | 0  | 0  | 0  | 0  | 0 | 0 | 0 | 0  | 0  |
| k_Bacteria;p_Chloroflexi;c_Anaerolineae;o_S0208;f_g_s_                                                  | 0  | 0  | 0  | 0 | 0 | 0 | 0 | 0 | 0 | 0 | 0  | 0  | 7   | 0  | 0  | 0  | 0  | 0 | 0 | 0 | 0  | 0  |
| k_Bacteria;p_Chloroflexi;c_Chloroflexi;o_Roseiflexales;f_g_s_                                           | 0  | 0  | 0  | 0 | 0 | 0 | 0 | 0 | 0 | 0 | 35 | 81 | 65  | 11 | 13 | 45 | 0  | 0 | 0 | 0 | 0  | 0  |
| k_Bacteria;p_Chloroflexi;c_Dehalococcoidetes;o_NT-B4;f_g_s_                                             | 0  | 0  | 0  | 0 | 0 | 0 | 0 | 0 | 0 | 0 | 2  | 0  | 5   | 0  | 0  | 0  | 0  | 0 | 0 | 0 | 0  | 2  |
| k_Bacteria;p_Chloroflexi;c_SOGA31;o_f_g_s_                                                              | 0  | 0  | 0  | 0 | 0 | 0 | 0 | 0 | 0 | 0 | 4  | 0  | 2   | 0  | 0  | 0  | 0  | 0 | 0 | 0 | 2  | 0  |
| k_Bacteria;p_Cyanobacteria;c_4C0d-2;o_mle1-12;f_g_s_                                                    | 6  | 0  | 0  | 0 | 0 | 0 | 0 | 0 | 0 | 0 | 5  | 0  | 4   | 3  | 11 | 0  | 0  | 0 | 0 | 0 | 0  | 0  |
| k_Bacteria;p_Cyanobacteria;c_4C0d-2;o_mle1-12;f_g_s_                                                    | 0  | 0  | 0  | 0 | 0 | 0 | 0 | 0 | 0 | 0 | 0  | 0  | 11  | 0  | 0  | 0  | 0  | 0 | 0 | 0 | 0  | 0  |
| k_Bacteria;p_Cyanobacteria;c_Chloroplast;o_f_g_s_                                                       | 0  | 0  | 0  | 0 | 0 | 0 | 0 | 0 | 0 | 0 | 4  | 0  | 0   | 0  | 0  | 0  | 0  | 0 | 0 | 0 | 0  | 0  |
| k_Bacteria;p_Cyanobacteria;c_Chloroplast;o_f_g_UA01;s_                                                  | 0  | 0  | 0  | 0 | 0 | 0 | 0 | 0 | 0 | 0 | 0  | 0  | 0   | 0  | 0  | 0  | 0  | 0 | 0 | 0 | 22 | 0  |
| k_Bacteria;p_Cyanobacteria;c_Chloroplast;o_f_g_UA01;s_                                                  | 0  | 0  | 0  | 0 | 0 | 0 | 0 | 0 | 0 | 0 | 0  | 0  | 0   | 0  | 0  | 0  | 0  | 0 | 0 | 0 | 0  | 4  |
| k_Bacteria;p_Cyanobacteria;c_Chloroplast;o_Cercoszia;f_Chlorarachniophyceae;g_s_                        | 17 | 0  | 0  | 0 | 0 | 0 | 0 | 0 | 0 | 0 | 0  | 0  | 0   | 0  | 0  | 0  | 0  | 0 | 0 | 0 | 0  | 0  |
| k_Bacteria;p_Cyanobacteria;c_Chloroplast;o_Chlorophyta;f_Mamiellaceae;g_s_                              | 0  | 4  | 0  | 0 | 0 | 0 | 0 | 0 | 0 | 0 | 0  | 0  | 0   | 0  | 0  | 0  | 0  | 0 | 0 | 0 | 0  | 0  |
| k_Bacteria;p_Cyanobacteria;c_Chloroplast;o_Chlorophyta;f_Trebouxiophyceae;g_s_                          | 0  | 0  | 0  | 0 | 0 | 0 | 0 | 0 | 0 | 0 | 0  | 0  | 0   | 0  | 0  | 0  | 0  | 0 | 0 | 0 | 3  | 0  |
| k_Bacteria;p_Cyanobacteria;c_Chloroplast;o_Chlorophyta;f_Ulvophyceae;g_s_                               | 0  | 0  | 0  | 0 | 0 | 0 | 0 | 0 | 0 | 0 | 0  | 0  | 0   | 5  | 4  | 0  | 0  | 0 | 0 | 0 | 0  | 0  |
| k_Bacteria;p_Cyanobacteria;c_Chloroplast;o_Chlorophyta;f_Ulvophyceae;g_s_                               | 0  | 2  | 0  | 0 | 0 | 0 | 0 | 0 | 0 | 0 | 0  | 0  | 0   | 0  | 4  | 0  | 0  | 0 | 0 | 0 | 0  | 0  |
| k_Bacteria;p_Cyanobacteria;c_Chloroplast;o_Rhodophyta;f_g_s_                                            | 0  | 0  | 0  | 0 | 0 | 0 | 0 | 0 | 0 | 0 | 24 | 23 | 117 | 52 | 55 | 69 | 65 | 0 | 0 | 0 | 0  | 0  |
| k_Bacteria;p_Cyanobacteria;c_Chloroplast;o_Rhodophyta;f_g_s_                                            | 0  | 0  | 0  | 0 | 0 | 0 | 0 | 0 | 0 | 0 | 0  | 18 | 8   | 2  | 13 | 12 | 0  | 0 | 0 | 0 | 0  | 0  |

|                                                                      |    |   |   |   |   |      |   |   |   |     |    |    |    |    |     |
|----------------------------------------------------------------------|----|---|---|---|---|------|---|---|---|-----|----|----|----|----|-----|
| k_Bacteria;p_Cyanobacteria;c_Chloroplast;o_Rhodophyta;f__;g__;s__    | 0  | 0 | 0 | 0 | 0 | 0    | 0 | 0 | 0 | 4   | 0  | 0  | 0  | 12 | 0   |
| k_Bacteria;p_Cyanobacteria;c_Chloroplast;o_Rhodophyta;f__;g__;s__    | 0  | 0 | 0 | 0 | 0 | 0    | 0 | 0 | 0 | 2   | 5  | 12 | 0  | 11 | 3   |
| k_Bacteria;p_Cyanobacteria;c_Chloroplast;o_Rhodophyta;f__;g__;s__    | 0  | 0 | 0 | 0 | 0 | 0    | 0 | 0 | 0 | 18  | 0  | 5  | 8  | 11 | 4   |
| k_Bacteria;p_Cyanobacteria;c_Chloroplast;o_Rhodophyta;f__;g__;s__    | 0  | 0 | 0 | 0 | 0 | 0    | 0 | 0 | 0 | 5   | 14 | 19 | 0  | 10 | 18  |
| k_Bacteria;p_Cyanobacteria;c_Chloroplast;o_Rhodophyta;f__;g__;s__    | 0  | 0 | 0 | 0 | 0 | 0    | 0 | 0 | 0 | 0   | 0  | 0  | 0  | 3  | 0   |
| k_Bacteria;p_Cyanobacteria;c_Chloroplast;o_Rhodophyta;f__;g__;s__    | 0  | 0 | 0 | 0 | 0 | 0    | 0 | 0 | 0 | 0   | 0  | 0  | 0  | 3  | 3   |
| k_Bacteria;p_Cyanobacteria;c_Chloroplast;o_Rhodophyta;f__;g__;s__    | 0  | 0 | 0 | 0 | 0 | 0    | 0 | 0 | 0 | 0   | 10 | 11 | 0  | 0  | 2   |
| k_Bacteria;p_Cyanobacteria;c_Chloroplast;o_Rhodophyta;f__;g__;s__    | 0  | 0 | 0 | 0 | 0 | 0    | 0 | 0 | 0 | 0   | 0  | 9  | 0  | 0  | 0   |
| k_Bacteria;p_Cyanobacteria;c_Chloroplast;o_Rhodophyta;f__;g__;s__    | 0  | 0 | 0 | 0 | 0 | 0    | 0 | 0 | 0 | 1   | 0  | 3  | 0  | 0  | 4   |
| k_Bacteria;p_Cyanobacteria;c_Chloroplast;o_Rhodophyta;f__;g__;s__    | 0  | 0 | 0 | 0 | 0 | 0    | 0 | 0 | 0 | 3   | 7  | 0  | 0  | 0  | 2   |
| k_Bacteria;p_Cyanobacteria;c_Chloroplast;o_Rhodophyta;f__;g__;s__    | 0  | 0 | 0 | 0 | 0 | 0    | 0 | 0 | 0 | 0   | 0  | 0  | 3  | 0  | 0   |
| k_Bacteria;p_Cyanobacteria;c_Chloroplast;o_Rhodophyta;f__;g__;s__    | 0  | 0 | 0 | 0 | 0 | 0    | 0 | 0 | 0 | 5   | 0  | 0  | 0  | 0  | 0   |
| k_Bacteria;p_Cyanobacteria;c_Chloroplast;o_Stramenopiles;f__;g__;s__ | 16 | 0 | 0 | 0 | 0 | 0    | 0 | 0 | 0 | 3   | 36 | 19 | 34 | 1  | 25  |
| k_Bacteria;p_Cyanobacteria;c_Chloroplast;o_Stramenopiles;f__;g__;s__ | 0  | 0 | 0 | 0 | 0 | 55   | 0 | 0 | 0 | 0   | 0  | 0  | 0  | 2  | 8   |
| k_Bacteria;p_Cyanobacteria;c_Chloroplast;o_Stramenopiles;f__;g__;s__ | 0  | 0 | 0 | 0 | 0 | 0    | 0 | 0 | 0 | 0   | 0  | 2  | 4  | 0  | 7   |
| k_Bacteria;p_Cyanobacteria;c_Chloroplast;o_Stramenopiles;f__;g__;s__ | 0  | 0 | 0 | 0 | 0 | 0    | 0 | 0 | 0 | 0   | 0  | 0  | 0  | 0  | 6   |
| k_Bacteria;p_Cyanobacteria;c_Chloroplast;o_Stramenopiles;f__;g__;s__ | 0  | 0 | 0 | 0 | 0 | 0    | 0 | 0 | 0 | 0   | 0  | 0  | 1  | 0  | 5   |
| k_Bacteria;p_Cyanobacteria;c_Chloroplast;o_Stramenopiles;f__;g__;s__ | 0  | 0 | 0 | 0 | 0 | 0    | 0 | 0 | 0 | 7   | 0  | 12 | 0  | 2  | 5   |
| k_Bacteria;p_Cyanobacteria;c_Chloroplast;o_Stramenopiles;f__;g__;s__ | 5  | 0 | 0 | 0 | 0 | 0    | 0 | 0 | 0 | 0   | 6  | 4  | 3  | 1  | 4   |
| k_Bacteria;p_Cyanobacteria;c_Chloroplast;o_Stramenopiles;f__;g__;s__ | 0  | 0 | 0 | 0 | 0 | 0    | 0 | 0 | 0 | 0   | 0  | 0  | 18 | 0  | 3   |
| k_Bacteria;p_Cyanobacteria;c_Chloroplast;o_Stramenopiles;f__;g__;s__ | 4  | 0 | 0 | 0 | 0 | 0    | 0 | 0 | 0 | 5   | 2  | 0  | 1  | 2  | 2   |
| k_Bacteria;p_Cyanobacteria;c_Chloroplast;o_Stramenopiles;f__;g__;s__ | 0  | 0 | 0 | 0 | 0 | 0    | 0 | 0 | 0 | 0   | 3  | 0  | 0  | 0  | 2   |
| k_Bacteria;p_Cyanobacteria;c_Chloroplast;o_Stramenopiles;f__;g__;s__ | 0  | 0 | 0 | 0 | 0 | 0    | 0 | 0 | 0 | 0   | 0  | 0  | 7  | 0  | 0   |
| k_Bacteria;p_Cyanobacteria;c_Chloroplast;o_Stramenopiles;f__;g__;s__ | 0  | 0 | 0 | 0 | 0 | 0    | 0 | 0 | 0 | 0   | 0  | 11 | 5  | 0  | 0   |
| k_Bacteria;p_Cyanobacteria;c_Chloroplast;o_Stramenopiles;f__;g__;s__ | 0  | 0 | 0 | 0 | 0 | 0    | 0 | 0 | 0 | 0   | 0  | 2  | 5  | 0  | 0   |
| k_Bacteria;p_Cyanobacteria;c_Chloroplast;o_Stramenopiles;f__;g__;s__ | 0  | 0 | 0 | 0 | 0 | 0    | 0 | 0 | 0 | 0   | 0  | 7  | 0  | 0  | 0   |
| k_Bacteria;p_Cyanobacteria;c_Chloroplast;o_Stramenopiles;f__;g__;s__ | 3  | 0 | 0 | 0 | 0 | 0    | 0 | 0 | 0 | 0   | 1  | 4  | 0  | 12 | 0   |
| k_Bacteria;p_Cyanobacteria;c_Chloroplast;o_Stramenopiles;f__;g__;s__ | 0  | 0 | 0 | 0 | 0 | 0    | 0 | 0 | 0 | 3   | 1  | 2  | 0  | 0  | 0   |
| k_Bacteria;p_Cyanobacteria;c_Chloroplast;o_Stramenopiles;f__;g__;s__ | 0  | 0 | 0 | 0 | 0 | 0    | 0 | 0 | 0 | 0   | 0  | 0  | 0  | 10 | 0   |
| k_Bacteria;p_Cyanobacteria;c_Chloroplast;o_Stramenopiles;f__;g__;s__ | 10 | 0 | 0 | 0 | 0 | 0    | 0 | 0 | 0 | 0   | 0  | 0  | 0  | 2  | 0   |
| k_Bacteria;p_Cyanobacteria;c_Chloroplast;o_Stramenopiles;f__;g__;s__ | 0  | 0 | 0 | 0 | 0 | 0    | 0 | 0 | 0 | 0   | 6  | 0  | 0  | 0  | 0   |
| k_Bacteria;p_Cyanobacteria;c_Chloroplast;o_Stramenopiles;f__;g__;s__ | 0  | 0 | 0 | 0 | 0 | 0    | 0 | 0 | 0 | 0   | 5  | 0  | 0  | 0  | 0   |
| k_Bacteria;p_Cyanobacteria;c_Chloroplast;o_Stramenopiles;f__;g__;s__ | 3  | 0 | 0 | 0 | 0 | 0    | 0 | 0 | 0 | 0   | 11 | 0  | 0  | 0  | 0   |
| k_Bacteria;p_Cyanobacteria;c_Chloroplast;o_Stramenopiles;f__;g__;s__ | 0  | 0 | 0 | 0 | 0 | 0    | 0 | 0 | 0 | 0   | 7  | 0  | 0  | 0  | 0   |
| k_Bacteria;p_Cyanobacteria;c_Chloroplast;o_Stramenopiles;f__;g__;s__ | 2  | 0 | 0 | 0 | 0 | 0    | 0 | 0 | 0 | 0   | 0  | 0  | 0  | 0  | 0   |
| k_Bacteria;p_Cyanobacteria;c_Chloroplast;o_Streptophyta;f__;g__;s__  | 0  | 0 | 0 | 0 | 0 | 7836 | 0 | 0 | 0 | 137 | 88 | 50 | 51 | 80 | 122 |
| k_Bacteria;p_Cyanobacteria;c_Chloroplast;o_Streptophyta;f__;g__;s__  | 10 | 0 | 0 | 0 | 0 | 0    | 0 | 0 | 0 | 16  | 30 | 17 | 13 | 3  | 4   |





|                                                                                                                                            |    |   |    |   |    |   |   |   |   |    |   |   |    |    |    |   |
|--------------------------------------------------------------------------------------------------------------------------------------------|----|---|----|---|----|---|---|---|---|----|---|---|----|----|----|---|
| k_Bacteria;p_Firmicutes;c_Bacilli;o_Lactobacillales;f_Streptococcaceae;g_Streptococcus;s_Streptococcusanguinis                             | 7  | 0 | 0  | 2 | 1  | 0 | 0 | 0 | 0 | 0  | 0 | 0 | 0  | 16 | 0  |   |
| k_Bacteria;p_Firmicutes;c_Bacilli;o_Lactobacillales;f_Streptococcaceae;g_Streptococcus;s_Streptococcusuis                                  | 0  | 0 | 5  | 2 | 0  | 0 | 0 | 0 | 0 | 0  | 0 | 0 | 0  | 0  | 0  |   |
| k_Bacteria;p_Firmicutes;c_Bacilli;o_Lactobacillales;f_Streptococcaceae;g_Streptococcus;s_Streptococcusthermophilus                         | 0  | 0 | 16 | 9 | 4  | 0 | 0 | 0 | 0 | 0  | 0 | 0 | 0  | 12 | 4  |   |
| k_Bacteria;p_Firmicutes;c_Clostridia;o_Clostridiales;f_Clostridiaceae;g__;s__                                                              | 1  | 0 | 0  | 0 | 0  | 0 | 0 | 0 | 0 | 0  | 0 | 5 | 23 | 0  | 6  |   |
| k_Bacteria;p_Firmicutes;c_Clostridia;o_Clostridiales;f_Clostridiaceae;g__;s__                                                              | 4  | 0 | 0  | 0 | 12 | 0 | 0 | 0 | 0 | 11 | 7 | 7 | 5  | 0  | 0  |   |
| k_Bacteria;p_Firmicutes;c_Clostridia;o_Clostridiales;f_Clostridiaceae;g__;s__                                                              | 0  | 0 | 0  | 0 | 0  | 0 | 0 | 0 | 0 | 4  | 0 | 4 | 0  | 0  | 0  |   |
| k_Bacteria;p_Firmicutes;c_Clostridia;o_Clostridiales;f_Clostridiaceae;g__;s__                                                              | 7  | 0 | 0  | 0 | 0  | 0 | 0 | 0 | 0 | 0  | 0 | 0 | 0  | 0  | 0  |   |
| k_Bacteria;p_Firmicutes;c_Clostridia;o_Clostridiales;f_Clostridiaceae;g__;s__                                                              | 1  | 0 | 0  | 0 | 0  | 0 | 0 | 0 | 0 | 5  | 0 | 0 | 0  | 0  | 0  |   |
| k_Bacteria;p_Firmicutes;c_Clostridia;o_Clostridiales;f_Clostridiaceae;g_Clostridium;s__                                                    | 0  | 0 | 0  | 0 | 0  | 0 | 0 | 0 | 0 | 0  | 0 | 0 | 10 | 0  | 0  |   |
| k_Bacteria;p_Firmicutes;c_Clostridia;o_Clostridiales;f_Clostridiaceae;g_Clostridium;s__                                                    | 0  | 3 | 0  | 0 | 0  | 0 | 0 | 0 | 0 | 0  | 8 | 1 | 0  | 0  | 2  |   |
| k_Bacteria;p_Firmicutes;c_Clostridia;o_Clostridiales;f_Clostridiaceae;g_Clostridium;s_Clostridiumbutyricum                                 | 1  | 0 | 0  | 3 | 0  | 0 | 0 | 0 | 0 | 0  | 0 | 0 | 0  | 0  | 1  | 7 |
| k_Bacteria;p_Firmicutes;c_Clostridia;o_Clostridiales;f_ClostridialesFamilyXI.IncertaeSedis;g_Anaerococcus;s__                              | 0  | 2 | 0  | 7 | 0  | 0 | 0 | 0 | 0 | 0  | 0 | 0 | 0  | 0  | 0  | 3 |
| k_Bacteria;p_Firmicutes;c_Clostridia;o_Clostridiales;f_ClostridialesFamilyXI.IncertaeSedis;g_Peptoniphilus;s_Peptoniphilusasaccharolyticus | 0  | 0 | 0  | 0 | 0  | 0 | 0 | 0 | 0 | 9  | 0 | 0 | 0  | 0  | 0  |   |
| k_Bacteria;p_Firmicutes;c_Clostridia;o_Clostridiales;f_ClostridialesFamilyXIII.IncertaeSedis;g_Mogibacterium;s__                           | 0  | 0 | 5  | 0 | 0  | 0 | 0 | 0 | 0 | 0  | 0 | 0 | 0  | 0  | 0  |   |
| k_Bacteria;p_Firmicutes;c_Clostridia;o_Clostridiales;f_Lachnospiraceae;g_Clostridium;s__                                                   | 0  | 4 | 5  | 0 | 0  | 0 | 0 | 0 | 0 | 0  | 0 | 0 | 0  | 4  | 0  |   |
| k_Bacteria;p_Firmicutes;c_Clostridia;o_Clostridiales;f_Veillonellaceae;g_Selenomonas;s__                                                   | 0  | 0 | 0  | 0 | 0  | 0 | 0 | 0 | 0 | 0  | 4 | 0 | 0  | 0  | 0  |   |
| k_Bacteria;p_Firmicutes;c_Clostridia;o_Clostridiales;f_Veillonellaceae;g_Veillonella;s_Veillonellaparvula                                  | 0  | 4 | 0  | 2 | 0  | 0 | 0 | 6 | 0 | 0  | 0 | 0 | 0  | 4  | 6  |   |
| k_Bacteria;p_Firmicutes;c_Clostridia;o_OPB54;f__;g__;s__                                                                                   | 0  | 0 | 0  | 0 | 0  | 0 | 5 | 0 | 0 | 4  | 0 | 0 | 0  | 0  | 0  |   |
| k_Bacteria;p_Fusobacteria;c_Fusobacteria;o_Fusobacteriales;f_Fusobacteriaceae;g_Leptotrichia;s__                                           | 0  | 0 | 0  | 0 | 0  | 0 | 0 | 0 | 0 | 0  | 0 | 0 | 10 | 0  | 0  |   |
| k_Bacteria;p_Gemmatimonadetes;c_Gemmatimonadetes;o__;f__;g__;s__                                                                           | 0  | 0 | 0  | 5 | 0  | 0 | 0 | 0 | 0 | 0  | 0 | 0 | 0  | 0  | 0  |   |
| k_Bacteria;p_Gemmatimonadetes;c_Gemmatimonadetes;o__;f__;g__;s__                                                                           | 0  | 6 | 0  | 0 | 0  | 0 | 0 | 0 | 0 | 0  | 0 | 0 | 0  | 0  | 0  |   |
| k_Bacteria;p_OP8;c_OP8_1;o_HMMVPog-54;f__;g__;s__                                                                                          | 0  | 0 | 0  | 0 | 0  | 0 | 0 | 6 | 0 | 0  | 0 | 0 | 0  | 0  | 0  |   |
| k_Bacteria;p_Planctomycetes;c_Phycisphaerae;o_Phycisphaerales;f_Phycisphaeraeae;g__;s__                                                    | 0  | 0 | 0  | 0 | 0  | 0 | 0 | 0 | 0 | 0  | 0 | 0 | 0  | 0  | 6  |   |
| k_Bacteria;p_Planctomycetes;c_Planctomycea;o_Pirellulales;f__;g__;s__                                                                      | 10 | 0 | 0  | 0 | 0  | 0 | 0 | 0 | 0 | 0  | 8 | 0 | 0  | 0  | 14 |   |
| k_Bacteria;p_Planctomycetes;c_Planctomycea;o_Pirellulales;f__;g__;s__                                                                      | 1  | 0 | 0  | 0 | 0  | 0 | 0 | 0 | 0 | 0  | 0 | 2 | 0  | 0  | 12 |   |
| k_Bacteria;p_Planctomycetes;c_Planctomycea;o_Pirellulales;f__;g__;s__                                                                      | 0  | 0 | 0  | 0 | 0  | 0 | 0 | 0 | 0 | 0  | 0 | 0 | 0  | 0  | 10 |   |
| k_Bacteria;p_Planctomycetes;c_Planctomycea;o_Pirellulales;f__;g__;s__                                                                      | 0  | 0 | 0  | 0 | 0  | 0 | 0 | 0 | 0 | 0  | 0 | 1 | 0  | 0  | 3  |   |
| k_Bacteria;p_Planctomycetes;c_Planctomycea;o_Pirellulales;f__;g__;s__                                                                      | 0  | 0 | 0  | 0 | 0  | 0 | 0 | 0 | 0 | 0  | 3 | 0 | 0  | 0  | 0  |   |
| k_Bacteria;p_Planctomycetes;c_Planctomycea;o_Pirellulales;f__;g__;s__                                                                      | 0  | 0 | 0  | 0 | 0  | 0 | 0 | 0 | 0 | 0  | 3 | 0 | 0  | 0  | 0  |   |
| k_Bacteria;p_Planctomycetes;c_Planctomycea;o_Pirellulales;f__;g__;s__                                                                      | 0  | 0 | 0  | 0 | 0  | 0 | 0 | 0 | 0 | 10 | 0 | 0 | 0  | 0  | 0  |   |
| k_Bacteria;p_Planctomycetes;c_Planctomycea;o_Pirellulales;f__Rhodopirellula;s__                                                            | 5  | 0 | 0  | 0 | 0  | 0 | 0 | 0 | 0 | 0  | 0 | 0 | 0  | 0  | 0  |   |
| k_Bacteria;p_Planctomycetes;c_Planctomycea;o_Pirellulales;f__Rhodopirellula;s__                                                            | 5  | 0 | 0  | 0 | 0  | 0 | 0 | 0 | 0 | 0  | 2 | 0 | 0  | 0  | 0  |   |
| k_Bacteria;p_Planctomycetes;c_Planctomycea;o_Pirellulales;f__Rhodopirellula;s__                                                            | 0  | 0 | 0  | 0 | 0  | 0 | 0 | 0 | 0 | 0  | 0 | 0 | 8  | 0  | 0  |   |
| k_Bacteria;p_Planctomycetes;c_Planctomycea;o_Pirellulales;f__Rhodopirellula;s__                                                            | 0  | 3 | 0  | 0 | 0  | 0 | 0 | 0 | 0 | 0  | 3 | 0 | 0  | 0  | 0  |   |
| k_Bacteria;p_Planctomycetes;c_Planctomycea;o_Pirellulales;f__Rhodopirellula;s__                                                            | 0  | 3 | 0  | 0 | 0  | 0 | 0 | 0 | 0 | 0  | 3 | 0 | 0  | 0  | 0  |   |
| k_Bacteria;p_Planctomycetes;c_Planctomycea;o_Pirellulales;f__Rhodopirellula;s__                                                            | 0  | 0 | 0  | 0 | 0  | 0 | 0 | 0 | 0 | 7  | 0 | 0 | 0  | 0  | 0  |   |









|                                                                                                                                   |     |     |     |     |     |    |    |   |    |     |     |     |
|-----------------------------------------------------------------------------------------------------------------------------------|-----|-----|-----|-----|-----|----|----|---|----|-----|-----|-----|
| k_Bacteria;p_Proteobacteria;c_Alphaproteobacteria;o_Rhodospirillales;f_Rhodospirillaceae;g_s                                      | 0   | 0   | 0   | 0   | 0   | 0  | 0  | 0 | 0  | 8   | 0   | 0   |
| k_Bacteria;p_Proteobacteria;c_Alphaproteobacteria;o_Rhodospirillales;f_Rhodospirillaceae;g_s                                      | 0   | 0   | 0   | 0   | 0   | 0  | 0  | 0 | 0  | 2   | 0   | 0   |
| k_Bacteria;p_Proteobacteria;c_Alphaproteobacteria;o_Rhodospirillales;f_Rhodospirillaceae;g_s                                      | 0   | 0   | 0   | 0   | 0   | 0  | 0  | 0 | 0  | 11  | 0   | 0   |
| k_Bacteria;p_Proteobacteria;c_Alphaproteobacteria;o_Rhodospirillales;f_Rhodospirillaceae;g_s                                      | 0   | 0   | 0   | 0   | 0   | 0  | 0  | 0 | 0  | 6   | 0   | 0   |
| k_Bacteria;p_Proteobacteria;c_Alphaproteobacteria;o_Rhodospirillales;f_Rhodospirillaceae;g_Magnetospirillum;s_Magnetospirillumsp. | 0   | 0   | 5   | 0   | 2   | 0  | 0  | 0 | 0  | 0   | 0   | 0   |
| k_Bacteria;p_Proteobacteria;c_Alphaproteobacteria;o_Rickettsiales;f_Rickettsiaceae;g_s                                            | 0   | 3   | 0   | 0   | 0   | 0  | 35 | 0 | 0  | 0   | 0   | 5   |
| k_Bacteria;p_Proteobacteria;c_Alphaproteobacteria;o_Rickettsiales;f_Rickettsiaceae;g_s                                            | 0   | 0   | 0   | 0   | 0   | 0  | 0  | 0 | 0  | 0   | 0   | 0   |
| k_Bacteria;p_Proteobacteria;c_Alphaproteobacteria;o_Sphingomonadales;f_g_s                                                        | 25  | 22  | 0   | 0   | 0   | 0  | 0  | 0 | 0  | 19  | 13  | 6   |
| k_Bacteria;p_Proteobacteria;c_Alphaproteobacteria;o_Sphingomonadales;f_g_s                                                        | 2   | 1   | 0   | 0   | 0   | 0  | 0  | 0 | 0  | 8   | 1   | 0   |
| k_Bacteria;p_Proteobacteria;c_Alphaproteobacteria;o_Sphingomonadales;f_g_s                                                        | 0   | 0   | 4   | 0   | 0   | 0  | 0  | 0 | 0  | 0   | 0   | 0   |
| k_Bacteria;p_Proteobacteria;c_Alphaproteobacteria;o_Sphingomonadales;f_Erythrobacteraceae;g_s                                     | 4   | 0   | 0   | 4   | 0   | 0  | 0  | 0 | 0  | 0   | 0   | 14  |
| k_Bacteria;p_Proteobacteria;c_Alphaproteobacteria;o_Sphingomonadales;f_Erythrobacteraceae;g_s                                     | 1   | 0   | 0   | 7   | 0   | 0  | 0  | 0 | 0  | 6   | 2   | 17  |
| k_Bacteria;p_Proteobacteria;c_Alphaproteobacteria;o_Sphingomonadales;f_Sphingomonadaceae;g_s                                      | 2   | 2   | 4   | 3   | 0   | 0  | 0  | 0 | 0  | 0   | 4   | 10  |
| k_Bacteria;p_Proteobacteria;c_Alphaproteobacteria;o_Sphingomonadales;f_Sphingomonadaceae;g_s                                      | 0   | 3   | 0   | 4   | 0   | 0  | 0  | 0 | 0  | 0   | 5   | 0   |
| k_Bacteria;p_Proteobacteria;c_Alphaproteobacteria;o_Sphingomonadales;f_Sphingomonadaceae;g_Novosphingobium;s                      | 843 | 711 | 406 | 965 | 697 | 71 | 30 | 0 | 40 | 0   | 16  | 0   |
| k_Bacteria;p_Proteobacteria;c_Alphaproteobacteria;o_Sphingomonadales;f_Sphingomonadaceae;g_Novosphingobium;s                      | 14  | 2   | 11  | 13  | 13  | 0  | 0  | 0 | 0  | 0   | 0   | 13  |
| k_Bacteria;p_Proteobacteria;c_Alphaproteobacteria;o_Sphingomonadales;f_Sphingomonadaceae;g_Novosphingobium;s                      | 32  | 8   | 3   | 12  | 14  | 0  | 0  | 0 | 0  | 0   | 0   | 11  |
| k_Bacteria;p_Proteobacteria;c_Alphaproteobacteria;o_Sphingomonadales;f_Sphingomonadaceae;g_Novosphingobium;s                      | 3   | 1   | 4   | 4   | 5   | 0  | 0  | 0 | 0  | 0   | 0   | 3   |
| k_Bacteria;p_Proteobacteria;c_Alphaproteobacteria;o_Sphingomonadales;f_Sphingomonadaceae;g_Novosphingobium;s                      | 1   | 1   | 0   | 0   | 0   | 0  | 0  | 0 | 0  | 0   | 0   | 0   |
| k_Bacteria;p_Proteobacteria;c_Alphaproteobacteria;o_Sphingomonadales;f_Sphingomonadaceae;g_Novosphingobium;s                      | 8   | 0   | 0   | 0   | 7   | 0  | 0  | 0 | 0  | 0   | 0   | 0   |
| k_Bacteria;p_Proteobacteria;c_Alphaproteobacteria;o_Sphingomonadales;f_Sphingomonadaceae;g_Sphingobium;s                          | 15  | 58  | 22  | 62  | 25  | 0  | 0  | 0 | 0  | 0   | 0   | 37  |
| k_Bacteria;p_Proteobacteria;c_Alphaproteobacteria;o_Sphingomonadales;f_Sphingomonadaceae;g_Sphingobium;s                          | 2   | 2   | 4   | 10  | 5   | 23 | 0  | 3 | 0  | 0   | 0   | 0   |
| k_Bacteria;p_Proteobacteria;c_Alphaproteobacteria;o_Sphingomonadales;f_Sphingomonadaceae;g_Sphingobium;s                          | 21  | 29  | 0   | 4   | 16  | 0  | 0  | 0 | 0  | 39  | 0   | 5   |
| k_Bacteria;p_Proteobacteria;c_Alphaproteobacteria;o_Sphingomonadales;f_Sphingomonadaceae;g_Sphingomonas;s                         | 5   | 0   | 1   | 3   | 0   | 0  | 0  | 0 | 0  | 0   | 0   | 7   |
| k_Bacteria;p_Proteobacteria;c_Alphaproteobacteria;o_Sphingomonadales;f_Sphingomonadaceae;g_Sphingomonas;s                         | 0   | 1   | 0   | 0   | 6   | 0  | 0  | 0 | 0  | 0   | 0   | 0   |
| k_Bacteria;p_Proteobacteria;c_Alphaproteobacteria;o_Sphingomonadales;f_Sphingomonadaceae;g_Sphingomonas;s                         | 2   | 0   | 0   | 0   | 0   | 0  | 0  | 0 | 0  | 0   | 0   | 0   |
| k_Bacteria;p_Proteobacteria;c_Alphaproteobacteria;o_Sphingomonadales;f_Sphingomonadaceae;g_Sphingomonas;s                         | 1   | 0   | 0   | 0   | 4   | 0  | 0  | 0 | 0  | 0   | 0   | 2   |
| k_Bacteria;p_Proteobacteria;c_Alphaproteobacteria;o_Sphingomonadales;f_Sphingomonadaceae;g_Sphingomonas;s                         | 0   | 0   | 0   | 0   | 0   | 5  | 0  | 0 | 0  | 0   | 0   | 0   |
| k_Bacteria;p_Proteobacteria;c_Alphaproteobacteria;o_Sphingomonadales;f_Sphingomonadaceae;g_Sphingomonas;s                         | 0   | 0   | 0   | 0   | 0   | 0  | 0  | 0 | 0  | 237 | 0   | 0   |
| k_Bacteria;p_Proteobacteria;c_Alphaproteobacteria;o_Sphingomonadales;f_Sphingomonadaceae;g_Sphingomonas;s_Caulobacterleidyia      | 3   | 43  | 76  | 22  | 20  | 50 | 57 | 0 | 0  | 0   | 0   | 4   |
| k_Bacteria;p_Proteobacteria;c_Alphaproteobacteria;o_Sphingomonadales;f_Sphingomonadaceae;g_Sphingomonas;s_Sphingomonasazotifigens | 2   | 0   | 3   | 3   | 5   | 19 | 9  | 0 | 0  | 0   | 0   | 0   |
| k_Bacteria;p_Proteobacteria;c_Alphaproteobacteria;o_Sphingomonadales;f_Sphingomonadaceae;g_Sphingopyxis;s                         | 0   | 0   | 1   | 0   | 4   | 0  | 0  | 0 | 0  | 0   | 0   | 0   |
| k_Bacteria;p_Proteobacteria;c_Betaproteobacteria;o_f_g_s                                                                          | 0   | 0   | 0   | 0   | 0   | 0  | 3  | 0 | 0  | 0   | 0   | 0   |
| k_Bacteria;p_Proteobacteria;c_Betaproteobacteria;o_Burkholderiales;f_g_s                                                          | 0   | 0   | 0   | 0   | 0   | 0  | 0  | 0 | 5  | 0   | 0   | 0   |
| k_Bacteria;p_Proteobacteria;c_Betaproteobacteria;o_Burkholderiales;f_g_Aquabacterium;s                                            | 73  | 134 | 98  | 2   | 12  | 17 | 14 | 9 | 9  | 188 | 130 | 199 |
|                                                                                                                                   |     |     |     |     |     |    |    |   |    | 24  |     | 122 |

|                                                                                                        |                         |       |       |       |
|--------------------------------------------------------------------------------------------------------|-------------------------|-------|-------|-------|
| k_Bacteria;p_Proteobacteria;c_Betaproteobacteria;o_Burkholderiales;f_g_Aquabacterium;s                 | 1                       | 21    | 13    | 12    |
| 0 17 23 0 0 0 0 0 0 0                                                                                  |                         |       |       |       |
| k_Bacteria;p_Proteobacteria;c_Betaproteobacteria;o_Burkholderiales;f_g_Aquabacterium;s                 | 0                       | 5     | 3     | 2     |
| 3 4 7 0 0 0 0 0 0 0                                                                                    |                         |       |       |       |
| k_Bacteria;p_Proteobacteria;c_Betaproteobacteria;o_Burkholderiales;f_g_Aquabacterium;s                 | 8                       | 1     | 4     | 1     |
| 0 4 2 0 0 0 0 0 0 0                                                                                    |                         |       |       |       |
| k_Bacteria;p_Proteobacteria;c_Betaproteobacteria;o_Burkholderiales;f_g_Aquabacterium;s                 | 0                       | 0     | 0     | 0     |
| 0 4 1 0 0 0 0 0 0 0                                                                                    |                         |       |       |       |
| k_Bacteria;p_Proteobacteria;c_Betaproteobacteria;o_Burkholderiales;f_g_Aquabacterium;s                 | 1                       | 3     | 6     | 0     |
| 1 0 5 0 0 0 0 0 0 0                                                                                    |                         |       |       |       |
| k_Bacteria;p_Proteobacteria;c_Betaproteobacteria;o_Burkholderiales;f_g_Aquabacterium;s                 | 0                       | 0     | 0     | 0     |
| 0 0 0 0 0 0 0 0 0 1                                                                                    |                         |       |       |       |
| k_Bacteria;p_Proteobacteria;c_Betaproteobacteria;o_Burkholderiales;f_g_Methylibium;s                   | 0                       | 0     | 0     | 0     |
| 0 0 0 5 0 0 0 0 0 0                                                                                    |                         |       |       |       |
| k_Bacteria;p_Proteobacteria;c_Betaproteobacteria;o_Burkholderiales;f_g_Paucibacter;s                   | 13                      | 14    | 1     | 2     |
| 0 1 0 0 0 0 13 0 0 0                                                                                   |                         |       |       |       |
| k_Bacteria;p_Proteobacteria;c_Betaproteobacteria;o_Burkholderiales;f_g_Tepidimonas;s                   | 0                       | 0     | 1     | 1     |
| 0 0 0 0 0 0 0 0 0 0                                                                                    |                         |       |       |       |
| k_Bacteria;p_Proteobacteria;c_Betaproteobacteria;o_Burkholderiales;f_Alcaligenaceae;g_s                | 0                       | 0     | 0     | 0     |
| 0 0 0 0 1 0 0 0 0 0                                                                                    |                         |       |       |       |
| k_Bacteria;p_Proteobacteria;c_Betaproteobacteria;o_Burkholderiales;f_Alcaligenaceae;g_Achromobacter;s  | Bordetellahinzii        |       |       | 0     |
| 1 1 3 5 0 0 0 0 0 0                                                                                    |                         |       |       |       |
| k_Bacteria;p_Proteobacteria;c_Betaproteobacteria;o_Burkholderiales;f_Burkholderiaceae;g_Burkholderia;s | 0                       | 2     | 0     | 0     |
| 2 0 1 1 0 0 0 0 0 0                                                                                    |                         |       |       |       |
| k_Bacteria;p_Proteobacteria;c_Betaproteobacteria;o_Burkholderiales;f_Burkholderiaceae;g_Burkholderia;s | Burkholderiamultivorans | 0     | 0     | 0     |
| 0 2 2 0 0 0 0 0 0 0                                                                                    |                         |       |       |       |
| k_Bacteria;p_Proteobacteria;c_Betaproteobacteria;o_Burkholderiales;f_Burkholderiaceae;g_Cupriavidus;s  | 0                       | 0     | 0     | 0     |
| 0 0 0 0 0 0 22 0 0 0                                                                                   |                         |       |       |       |
| k_Bacteria;p_Proteobacteria;c_Betaproteobacteria;o_Burkholderiales;f_Burkholderiaceae;g_Cupriavidus;s  | Cupriavidustaiwanensis  | 111   |       |       |
| 28 40 22 10 27 29 113 135 0 6                                                                          |                         | 26    | 75    | 0     |
| k_Bacteria;p_Proteobacteria;c_Betaproteobacteria;o_Burkholderiales;f_Burkholderiaceae;g_Lautropia;s    | 8                       | 0     | 0     | 0     |
| 0 3 0 0 0 0 0 0 0 0                                                                                    |                         |       |       |       |
| k_Bacteria;p_Proteobacteria;c_Betaproteobacteria;o_Burkholderiales;f_Burkholderiaceae;g_Ralstonia;s    | 42                      | 44    | 61    |       |
| 22 6 43 44 172 0 23 27 82 126                                                                          |                         | 47    |       |       |
| k_Bacteria;p_Proteobacteria;c_Betaproteobacteria;o_Burkholderiales;f_Comamonadaceae;g_s                | 20980                   | 15057 | 15019 | 13540 |
| 9491 15781 12282 268 67 168 514 110 453 231                                                            |                         |       |       |       |
| k_Bacteria;p_Proteobacteria;c_Betaproteobacteria;o_Burkholderiales;f_Comamonadaceae;g_s                | 5                       | 102   | 100   | 24    |
| 44 63 102 0 0 0 0 0 0 0                                                                                |                         |       |       |       |
| k_Bacteria;p_Proteobacteria;c_Betaproteobacteria;o_Burkholderiales;f_Comamonadaceae;g_s                | 1                       | 15    | 10    | 6     |
| 8 11 16 0 0 0 0 0 0 0                                                                                  |                         |       |       |       |
| k_Bacteria;p_Proteobacteria;c_Betaproteobacteria;o_Burkholderiales;f_Comamonadaceae;g_s                | 1                       | 7     | 10    | 0     |
| 4 4 8 0 0 0 0 0 0 0                                                                                    |                         |       |       |       |
| k_Bacteria;p_Proteobacteria;c_Betaproteobacteria;o_Burkholderiales;f_Comamonadaceae;g_s                | 0                       | 2     | 0     | 3     |
| 0 1 1 0 0 0 0 0 0 0                                                                                    |                         |       |       |       |
| k_Bacteria;p_Proteobacteria;c_Betaproteobacteria;o_Burkholderiales;f_Comamonadaceae;g_s                | 0                       | 7     | 6     | 2     |
| 0 1 2 0 0 0 0 0 0 0                                                                                    |                         |       |       |       |
| k_Bacteria;p_Proteobacteria;c_Betaproteobacteria;o_Burkholderiales;f_Comamonadaceae;g_s                | 0                       | 1     | 3     | 0     |
| 4 1 2 0 0 0 0 0 0 0                                                                                    |                         |       |       |       |
| k_Bacteria;p_Proteobacteria;c_Betaproteobacteria;o_Burkholderiales;f_Comamonadaceae;g_s                | 2                       | 0     | 1     | 0     |
| 0 0 0 0 0 0 0 0 0 0                                                                                    |                         |       |       |       |
| k_Bacteria;p_Proteobacteria;c_Betaproteobacteria;o_Burkholderiales;f_Comamonadaceae;g_s                | 0                       | 0     | 0     | 0     |
| 3 0 0 0 0 0 0 0 0 0                                                                                    |                         |       |       |       |
| k_Bacteria;p_Proteobacteria;c_Betaproteobacteria;o_Burkholderiales;f_Comamonadaceae;g_Acidovorax;s     | 0                       | 0     | 3     |       |
| 0 0 1 2 0 0 0 0 0 0                                                                                    |                         |       |       |       |
| k_Bacteria;p_Proteobacteria;c_Betaproteobacteria;o_Burkholderiales;f_Comamonadaceae;g_Comamonas;s      | 0                       | 0     | 3     |       |
| 0 0 0 0 0 0 0 0 0 0                                                                                    |                         |       |       |       |
| k_Bacteria;p_Proteobacteria;c_Betaproteobacteria;o_Burkholderiales;f_Comamonadaceae;g_Comamonas;s      | Comamonasaquatica       | 68    |       |       |
| 18 26 32 15 55 26 0 0 0 0                                                                              |                         | 0     | 0     | 0     |
| k_Bacteria;p_Proteobacteria;c_Betaproteobacteria;o_Burkholderiales;f_Comamonadaceae;g_Comamonas;s      | Comamonasaquatica       | 0     |       |       |
| 0 2 0 0 0 0 0 0 0 0                                                                                    |                         | 0     | 0     | 0     |
| k_Bacteria;p_Proteobacteria;c_Betaproteobacteria;o_Burkholderiales;f_Comamonadaceae;g_Delftia;s        | 49                      | 130   | 140   |       |
| 114 69 184 118 0 0 0 0 0 0                                                                             |                         |       |       |       |
| k_Bacteria;p_Proteobacteria;c_Betaproteobacteria;o_Burkholderiales;f_Comamonadaceae;g_Diaphorobacter;s | 1121                    | 1120  | 1319  |       |
| 986 573 1059 930 29 22 11 41 8 83 21                                                                   |                         |       |       |       |
| k_Bacteria;p_Proteobacteria;c_Betaproteobacteria;o_Burkholderiales;f_Comamonadaceae;g_Diaphorobacter;s | 0                       | 20    | 7     |       |
| 2 6 9 11 0 0 0 0 0 0                                                                                   |                         |       |       |       |
| k_Bacteria;p_Proteobacteria;c_Betaproteobacteria;o_Burkholderiales;f_Comamonadaceae;g_Diaphorobacter;s | 0                       | 2     | 3     |       |
| 0 1 0 1 0 0 0 0 0 0                                                                                    |                         |       |       |       |
| k_Bacteria;p_Proteobacteria;c_Betaproteobacteria;o_Burkholderiales;f_Comamonadaceae;g_Giesbergeria;s   | 4                       | 0     | 2     |       |
| 1 0 0 0 0 0 0 0 0 0                                                                                    |                         |       |       |       |
| k_Bacteria;p_Proteobacteria;c_Betaproteobacteria;o_Burkholderiales;f_Comamonadaceae;g_Hylemonella;s    | 0                       | 12    | 4     |       |
| 0 2 8 5 4 0 0 0 0 0                                                                                    |                         |       |       |       |
| k_Bacteria;p_Proteobacteria;c_Betaproteobacteria;o_Burkholderiales;f_Comamonadaceae;g_Rhodiferax;s     | 65                      | 213   | 210   |       |

|                                                                                                                                        |     |     |     |     |   |    |    |    |    |     |     |     |     |
|----------------------------------------------------------------------------------------------------------------------------------------|-----|-----|-----|-----|---|----|----|----|----|-----|-----|-----|-----|
| k_Bacteria;p_Proteobacteria;c_Betaproteobacteria;o_Burkholderiales;f_Comamonadaceae;g_Rhodofera;s_                                     | 210 | 54  | 133 | 141 | 0 | 0  | 0  | 0  | 0  | 0   | 0   | 2   | 7   |
|                                                                                                                                        | 1   | 1   | 2   | 8   | 0 | 0  | 0  | 0  | 0  | 0   | 0   | 0   | 0   |
| k_Bacteria;p_Proteobacteria;c_Betaproteobacteria;o_Burkholderiales;f_Comamonadaceae;g_Simplicispira;s_                                 | 7   | 0   | 3   | 15  | 0 | 0  | 0  | 0  | 0  | 0   | 0   | 3   | 6   |
| k_Bacteria;p_Proteobacteria;c_Betaproteobacteria;o_Burkholderiales;f_Comamonadaceae;g_Variovorax;s_Variovoraxparadoxus                 | 0   | 0   | 0   | 0   | 0 | 0  | 0  | 48 | 0  | 0   | 0   | 0   | 0   |
| k_Bacteria;p_Proteobacteria;c_Betaproteobacteria;o_Burkholderiales;f_Oxalobacteraceae;g_;                                              | 0   | 4   | 1   | 0   | 0 | 0  | 0  | 34 | 0  | 0   | 13  | 1   | 11  |
| k_Bacteria;p_Proteobacteria;c_Betaproteobacteria;o_Burkholderiales;f_Oxalobacteraceae;g_Herbaspirillum;s_                              | 0   | 0   | 0   | 0   | 0 | 0  | 0  | 31 | 0  | 0   | 0   | 0   | 0   |
| k_Bacteria;p_Proteobacteria;c_Betaproteobacteria;o_Burkholderiales;f_Oxalobacteraceae;g_Massilia;s_Massiliatimonae                     | 0   | 15  | 0   | 8   | 4 | 0  | 0  | 12 | 1  | 0   | 0   | 0   | 8   |
| k_Bacteria;p_Proteobacteria;c_Betaproteobacteria;o_Burkholderiales;f_Oxalobacteraceae;g_Massilia;s_Massiliatimonae                     | 0   | 5   | 0   | 0   | 0 | 0  | 0  | 0  | 0  | 0   | 0   | 0   | 0   |
| k_Bacteria;p_Proteobacteria;c_Betaproteobacteria;o_Burkholderiales;f_Oxalobacteraceae;g_Massilia;s_Massiliatimonae                     | 0   | 3   | 0   | 0   | 0 | 0  | 0  | 0  | 0  | 0   | 0   | 0   | 3   |
| k_Bacteria;p_Proteobacteria;c_Betaproteobacteria;o_Burkholderiales;f_Oxalobacteraceae;g_Massilia;s_Massiliatimonae                     | 0   | 3   | 0   | 0   | 0 | 0  | 0  | 0  | 0  | 0   | 0   | 0   | 0   |
| k_Bacteria;p_Proteobacteria;c_Betaproteobacteria;o_Burkholderiales;f_Oxalobacteraceae;g_Massilia;s_Massiliatimonae                     | 0   | 3   | 0   | 0   | 1 | 0  | 0  | 0  | 0  | 0   | 0   | 0   | 5   |
| k_Bacteria;p_Proteobacteria;c_Betaproteobacteria;o_Burkholderiales;f_Oxalobacteraceae;g_Massilia;s_Massiliatimonae                     | 4   | 0   | 1   | 0   | 1 | 0  | 0  | 0  | 0  | 0   | 0   | 0   | 0   |
| k_Bacteria;p_Proteobacteria;c_Betaproteobacteria;o_Hydrogenophilales;f_Hydrogenophilaceae;g_Hydrogenophilus;s_Hydrogenophilusthermolut | 3   | 2   | 3   | 0   | 5 | 0  | 0  | 0  | 0  | 0   | 0   | 0   | 0   |
| olus                                                                                                                                   | 0   |     |     |     |   |    |    |    |    |     |     |     |     |
| k_Bacteria;p_Proteobacteria;c_Betaproteobacteria;o_Methylophilales;f_Methylophilaceae;g_Methylobacillus;s_Methylobacillusflagellatus   | 5   | 3   | 12  | 4   | 6 | 0  | 0  | 0  | 0  | 0   | 0   | 0   | 0   |
| k_Bacteria;p_Proteobacteria;c_Betaproteobacteria;o_Neisseriales;f_Neisseriaceae;g_;                                                    | 2   | 0   | 0   | 0   | 0 | 0  | 0  | 0  | 0  | 1   | 0   | 2   | 3   |
| k_Bacteria;p_Proteobacteria;c_Betaproteobacteria;o_Neisseriales;f_Neisseriaceae;g_Neisseria;s_                                         | 3   | 0   | 2   | 18  | 0 | 0  | 0  | 0  | 0  | 2   | 0   | 6   | 0   |
| k_Bacteria;p_Proteobacteria;c_Betaproteobacteria;o_Rhodocyclales;f_;                                                                   | 0   | 0   | 0   | 0   | 0 | 0  | 0  | 0  | 0  | 0   | 0   | 0   | 7   |
| k_Bacteria;p_Proteobacteria;c_Betaproteobacteria;o_Rhodocyclales;f_Rhodocyclaceae;g_;                                                  | 88  | 170 | 111 | 0   | 0 | 0  | 11 | 14 | 0  | 195 | 158 | 209 | 180 |
| k_Bacteria;p_Proteobacteria;c_Betaproteobacteria;o_Rhodocyclales;f_Rhodocyclaceae;g_;                                                  | 15  | 10  | 10  | 0   | 0 | 0  | 0  | 0  | 0  | 23  | 25  | 35  | 20  |
| k_Bacteria;p_Proteobacteria;c_Betaproteobacteria;o_Rhodocyclales;f_Rhodocyclaceae;g_;                                                  | 0   | 4   | 4   | 0   | 0 | 0  | 0  | 0  | 0  | 0   | 3   | 2   | 0   |
| k_Bacteria;p_Proteobacteria;c_Betaproteobacteria;o_Rhodocyclales;f_Rhodocyclaceae;g_;                                                  | 1   | 3   | 2   | 0   | 0 | 0  | 0  | 0  | 0  | 0   | 1   | 5   | 1   |
| k_Bacteria;p_Proteobacteria;c_Betaproteobacteria;o_Rhodocyclales;f_Rhodocyclaceae;g_;                                                  | 0   | 0   | 0   | 0   | 0 | 0  | 0  | 0  | 0  | 5   | 3   | 0   | 7   |
| k_Bacteria;p_Proteobacteria;c_Betaproteobacteria;o_Rhodocyclales;f_Rhodocyclaceae;g_;                                                  | 0   | 0   | 0   | 0   | 0 | 0  | 0  | 0  | 0  | 0   | 0   | 4   | 0   |
| k_Bacteria;p_Proteobacteria;c_Betaproteobacteria;o_Rhodocyclales;f_Rhodocyclaceae;g_Azospira;s_                                        | 4   | 0   | 7   | 0   | 0 | 0  | 0  | 0  | 0  | 0   | 2   | 0   | 5   |
| k_Bacteria;p_Proteobacteria;c_Betaproteobacteria;o_Rhodocyclales;f_Rhodocyclaceae;g_Methyloversatilis;s_Methyloversatilisuniversalis   | 2   | 18  | 21  | 16  | 5 | 22 | 29 | 0  | 0  | 0   | 43  | 0   | 0   |
| k_Bacteria;p_Proteobacteria;c_Betaproteobacteria;o_Rhodocyclales;f_Rhodocyclaceae;g_Zoogloea;s_                                        | 41  | 14  | 32  | 16  | 0 | 0  | 0  | 7  | 0  | 40  | 48  | 75  |     |
| k_Bacteria;p_Proteobacteria;c_Betaproteobacteria;o_Rhodocyclales;f_Rhodocyclaceae;g_Zoogloea;s_Zoogloeamigera                          | 0   | 2   | 1   | 1   | 4 | 0  | 0  | 50 | 0  | 0   | 0   | 0   | 9   |
| k_Bacteria;p_Proteobacteria;c_Betaproteobacteria;o_Rhodocyclales;f_Rhodocyclaceae;g_Zoogloea;s_Zoogloeaesiniphila                      | 1   | 3   | 1   | 7   | 0 | 0  | 0  | 0  | 0  | 0   | 0   | 0   | 4   |
| k_Bacteria;p_Proteobacteria;c_Deltaproteobacteria;o_;                                                                                  | 0   | 0   | 0   | 0   | 0 | 0  | 0  | 4  | 0  | 0   | 0   | 0   | 0   |
| k_Bacteria;p_Proteobacteria;c_Deltaproteobacteria;o_Desulfobacterales;f_Desulfobulbaceae;g_;                                           | 0   | 0   | 0   | 0   | 0 | 0  | 19 | 0  | 0  | 0   | 0   | 0   | 0   |
| k_Bacteria;p_Proteobacteria;c_Deltaproteobacteria;o_Desulfobacterales;f_Desulfobulbaceae;g_Desulforhopalus;s_                          | 3   | 0   | 0   | 0   | 0 | 0  | 0  | 0  | 0  | 0   | 0   | 0   | 5   |
| k_Bacteria;p_Proteobacteria;c_Deltaproteobacteria;o_MIZ46;f_;                                                                          | 0   | 0   | 14  | 0   | 0 | 0  | 0  | 6  | 2  | 0   | 0   | 0   | 0   |
| k_Bacteria;p_Proteobacteria;c_Deltaproteobacteria;o_Myxococcales;f_;                                                                   | 84  | 0   | 0   | 0   | 0 | 0  | 0  | 0  | 61 | 86  | 134 | 209 | 27  |
| k_Bacteria;p_Proteobacteria;c_Deltaproteobacteria;o_Myxococcales;f_;                                                                   | 10  | 0   | 0   | 0   | 0 | 0  | 0  | 0  | 0  | 0   | 0   | 1   | 0   |
| k_Bacteria;p_Proteobacteria;c_Deltaproteobacteria;o_Myxococcales;f_;                                                                   | 0   | 0   | 0   | 0   | 0 | 0  | 0  | 0  | 0  | 1   | 0   | 4   | 0   |
| k_Bacteria;p_Proteobacteria;c_Deltaproteobacteria;o_Myxococcales;f_;                                                                   | 0   | 0   | 0   | 0   | 0 | 0  | 0  | 0  | 0  | 0   | 4   | 0   | 0   |
| k_Bacteria;p_Proteobacteria;c_Deltaproteobacteria;o_Myxococcales;f_;                                                                   | 0   | 0   | 0   | 0   | 0 | 0  | 0  | 0  | 0  | 0   | 5   | 0   | 0   |



|                                                                                                                                 |    |    |     |   |    |     |     |    |   |   |    |
|---------------------------------------------------------------------------------------------------------------------------------|----|----|-----|---|----|-----|-----|----|---|---|----|
| 0                                                                                                                               | 0  | 0  | 0   | 0 | 0  | 0   | 1   | 0  | 0 | 0 | 0  |
| k_Bacteria;p_Proteobacteria;c_Gammaproteobacteria;o_Pseudomonadales;f_Pseudomonadaceae;g_Pseudomonas;s_                         | 0  | 0  | 0   | 0 | 0  | 0   | 0   | 0  | 0 | 0 | 0  |
| 0                                                                                                                               | 0  | 0  | 0   | 0 | 0  | 0   | 0   | 0  | 0 | 1 | 0  |
| k_Bacteria;p_Proteobacteria;c_Gammaproteobacteria;o_Pseudomonadales;f_Pseudomonadaceae;g_Pseudomonas;s_                         | 0  | 0  | 0   | 0 | 0  | 0   | 0   | 0  | 0 | 0 | 0  |
| 0                                                                                                                               | 0  | 0  | 0   | 0 | 0  | 0   | 0   | 0  | 0 | 1 | 0  |
| k_Bacteria;p_Proteobacteria;c_Gammaproteobacteria;o_Salinisphaerales;f_Salinisphaeraceae;g_Salinisphaera;s_                     | 0  | 0  | 0   | 0 | 0  | 0   | 0   | 10 | 0 | 0 | 0  |
| 0                                                                                                                               | 0  | 0  | 0   | 0 | 0  | 0   | 0   | 0  | 0 | 0 | 0  |
| k_Bacteria;p_Proteobacteria;c_Gammaproteobacteria;o_Vibrionales;f_Vibrionaceae;g_Vibrio;s_                                      | 4  | 0  | 0   | 0 | 0  | 0   | 0   | 0  | 0 | 0 | 0  |
| 0                                                                                                                               | 0  | 0  | 0   | 0 | 0  | 0   | 0   | 0  | 0 | 0 | 0  |
| k_Bacteria;p_Proteobacteria;c_Gammaproteobacteria;o_Xanthomonadales;f_Xanthomonadaceae;g_Pseudoxanthomonas;s_Pseudoxanthomonasm | 0  | 0  | 0   | 2 | 0  | 0   | 1   | 0  | 0 | 0 | 0  |
| exicana                                                                                                                         | 0  | 0  | 0   | 2 | 0  | 0   | 1   | 0  | 0 | 0 | 0  |
| 0                                                                                                                               | 0  | 0  | 0   | 0 | 0  | 0   | 0   | 0  | 0 | 0 | 0  |
| k_Bacteria;p_Proteobacteria;c_Gammaproteobacteria;o_Xanthomonadales;f_Xanthomonadaceae;g_Stenotrophomonas;s_                    | 0  | 0  | 0   | 0 | 0  | 0   | 0   | 0  | 0 | 0 | 3  |
| 3                                                                                                                               | 3  | 2  | 17  | 0 | 0  | 0   | 0   | 0  | 0 | 0 | 0  |
| k_Bacteria;p_Proteobacteria;c_Gammaproteobacteria;o_Xanthomonadales;f_Xanthomonadaceae;g_Stenotrophomonas;s_                    | 0  | 0  | 0   | 0 | 0  | 0   | 0   | 0  | 0 | 0 | 0  |
| 3                                                                                                                               | 2  | 2  | 3   | 0 | 0  | 0   | 0   | 0  | 0 | 0 | 0  |
| k_Bacteria;p_Proteobacteria;c_Gammaproteobacteria;o_Xanthomonadales;f_Xanthomonadaceae;g_Stenotrophomonas;s_                    | 0  | 0  | 0   | 6 | 0  | 0   | 0   | 0  | 0 | 0 | 0  |
| 0                                                                                                                               | 0  | 0  | 0   | 6 | 0  | 0   | 0   | 0  | 0 | 0 | 0  |
| k_Bacteria;p_Proteobacteria;c_Gammaproteobacteria;o_Xanthomonadales;f_Xanthomonadaceae;g_Thermomonas;s_                         | 2  | 0  | 0   | 0 | 0  | 0   | 0   | 0  | 0 | 0 | 0  |
| 2                                                                                                                               | 0  | 0  | 0   | 0 | 0  | 0   | 0   | 0  | 0 | 0 | 0  |
| k_Bacteria;p_Proteobacteria;c_Gammaproteobacteria;o_Xanthomonadales;f_Xanthomonadaceae;g_Thermomonas;s_Thermomonasfusca         | 0  | 3  | 4   | 1 | 0  | 5   | 3   | 0  | 0 | 0 | 0  |
| 0                                                                                                                               | 3  | 4  | 1   | 0 | 5  | 3   | 0   | 0  | 0 | 0 | 0  |
| 0                                                                                                                               | 0  | 0  | 0   | 0 | 0  | 0   | 0   | 0  | 0 | 0 | 0  |
| k_Bacteria;p_Proteobacteria;c_Gammaproteobacteria;o_Xanthomonadales;f_Xanthomonadaceae;g_Xanthomonas;s_                         | 1  | 5  | 9   | 4 | 2  | 0   | 0   | 4  | 0 | 0 | 12 |
| 1                                                                                                                               | 5  | 9  | 4   | 2 | 0  | 0   | 0   | 4  | 0 | 0 | 6  |
| k_Bacteria;p_SBR1093;c_EC214;o_;f_;g_;s_                                                                                        | 0  | 0  | 0   | 0 | 0  | 0   | 0   | 0  | 0 | 2 | 0  |
| 0                                                                                                                               | 0  | 0  | 0   | 0 | 0  | 0   | 0   | 0  | 0 | 2 | 0  |
| k_Bacteria;p_Spirochaetes;c_Spirochaetes;o_Spirochaetales;f_Spirochaetaceae;g_Spirochaeta;s_                                    | 0  | 0  | 0   | 0 | 0  | 0   | 0   | 0  | 0 | 3 | 0  |
| 0                                                                                                                               | 0  | 0  | 0   | 0 | 0  | 0   | 0   | 0  | 0 | 3 | 0  |
| k_Bacteria;p_SR1;c_;o_;f_;g_;s_                                                                                                 | 0  | 0  | 0   | 7 | 0  | 0   | 0   | 0  | 0 | 0 | 0  |
| 0                                                                                                                               | 0  | 0  | 0   | 7 | 0  | 0   | 0   | 0  | 0 | 0 | 0  |
| k_Bacteria;p_Tenericutes;c_Erysipelotrichi;o_Erysipelotrichales;f_Erysipelotrichaceae;g_PSB-M-3;s_                              | 0  | 0  | 0   | 0 | 0  | 10  | 0   | 0  | 0 | 0 | 0  |
| 0                                                                                                                               | 0  | 0  | 0   | 0 | 0  | 10  | 0   | 0  | 0 | 0 | 0  |
| k_Bacteria;p_Thermi;c_Deinococci;o_Deinococcales;f_Deinococcaceae;g_Deinococcus;s_                                              | 0  | 0  | 0   | 0 | 0  | 0   | 0   | 0  | 0 | 9 | 0  |
| 0                                                                                                                               | 0  | 0  | 0   | 0 | 0  | 0   | 0   | 0  | 0 | 9 | 0  |
| k_Bacteria;p_Thermi;c_Deinococci;o_Thermales;f_Thermaceae;g_Meiothermus;s_                                                      | 5  | 0  | 0   | 0 | 0  | 0   | 0   | 0  | 0 | 2 | 0  |
| 5                                                                                                                               | 0  | 0  | 0   | 0 | 0  | 0   | 0   | 0  | 0 | 2 | 0  |
| k_Bacteria;p_TM6;c_SJA-4;o_;f_;g_;s_                                                                                            | 0  | 0  | 0   | 0 | 0  | 1   | 0   | 5  | 0 | 0 | 0  |
| 0                                                                                                                               | 0  | 0  | 0   | 0 | 0  | 1   | 0   | 5  | 0 | 0 | 0  |
| k_Bacteria;p_TM7;c_TM7-1;o_;f_;g_;s_                                                                                            | 0  | 0  | 0   | 0 | 8  | 0   | 0   | 0  | 3 | 4 | 0  |
| 0                                                                                                                               | 0  | 0  | 0   | 0 | 8  | 0   | 0   | 0  | 3 | 4 | 0  |
| k_Bacteria;p_TM7;c_TM7-3;o_EW055;f_;g_;s_                                                                                       | 15 | 0  | 0   | 0 | 0  | 0   | 0   | 0  | 0 | 0 | 0  |
| 15                                                                                                                              | 0  | 0  | 0   | 0 | 0  | 0   | 0   | 0  | 0 | 0 | 0  |
| k_Bacteria;p_Verrucomicrobia;c_Opitutae;o_Puniceicoccales;f_Puniceicoccaceae;g_;s_                                              | 3  | 0  | 0   | 0 | 0  | 0   | 0   | 0  | 0 | 0 | 0  |
| 3                                                                                                                               | 0  | 0  | 0   | 0 | 0  | 0   | 0   | 0  | 0 | 0 | 0  |
| k_Bacteria;p_Verrucomicrobia;c_Opitutae;o_Puniceicoccales;f_Puniceicoccaceae;g_Pelagicoccus;s_                                  | 0  | 0  | 0   | 0 | 0  | 0   | 0   | 0  | 0 | 0 | 3  |
| 0                                                                                                                               | 0  | 0  | 0   | 0 | 0  | 0   | 0   | 0  | 0 | 0 | 3  |
| k_Bacteria;p_WPS-2;c_;o_;f_;g_;s_                                                                                               | 0  | 0  | 0   | 0 | 0  | 0   | 0   | 4  | 0 | 0 | 0  |
| 0                                                                                                                               | 0  | 0  | 0   | 0 | 0  | 0   | 0   | 4  | 0 | 0 | 0  |
| k_Bacteria;p_ZB2;c_;o_;f_;g_;s_                                                                                                 | 0  | 0  | 0   | 0 | 0  | 0   | 0   | 2  | 0 | 0 | 0  |
| 0                                                                                                                               | 0  | 0  | 0   | 0 | 0  | 0   | 0   | 2  | 0 | 0 | 0  |
| No blast hit                                                                                                                    | 38 | 44 | 194 | 9 | 33 | 132 | 137 | 0  | 0 | 0 | 0  |
| 0                                                                                                                               | 38 | 44 | 194 | 9 | 33 | 132 | 137 | 0  | 0 | 0 | 0  |
| No blast hit                                                                                                                    | 0  | 1  | 13  | 0 | 1  | 2   | 8   | 0  | 0 | 0 | 0  |
| 0                                                                                                                               | 0  | 1  | 13  | 0 | 1  | 2   | 8   | 0  | 0 | 0 | 0  |
| No blast hit                                                                                                                    | 0  | 0  | 23  | 0 | 0  | 0   | 16  | 0  | 0 | 0 | 0  |
| 0                                                                                                                               | 0  | 0  | 23  | 0 | 0  | 0   | 16  | 0  | 0 | 0 | 0  |
| No blast hit                                                                                                                    | 0  | 0  | 2   | 0 | 0  | 0   | 0   | 0  | 0 | 0 | 0  |
| 0                                                                                                                               | 0  | 0  | 2   | 0 | 0  | 0   | 0   | 0  | 0 | 0 | 0  |
| No blast hit                                                                                                                    | 0  | 0  | 0   | 0 | 0  | 0   | 4   | 0  | 0 | 0 | 0  |
| 0                                                                                                                               | 0  | 0  | 0   | 0 | 0  | 0   | 4   | 0  | 0 | 0 | 0  |
| No blast hit                                                                                                                    | 0  | 0  | 0   | 0 | 0  | 0   | 0   | 0  | 1 | 0 | 0  |
| 1                                                                                                                               | 1  | 1  | 1   | 1 | 1  | 1   | 1   | 1  | 1 | 1 | 1  |
| No blast hit                                                                                                                    | 0  | 0  | 0   | 0 | 0  | 0   | 1   | 2  | 2 | 1 | 3  |
| 8                                                                                                                               | 0  | 0  | 0   | 0 | 0  | 0   | 1   | 2  | 2 | 1 | 3  |
| No blast hit                                                                                                                    | 0  | 0  | 0   | 0 | 0  | 0   | 0   | 0  | 0 | 0 | 1  |
| 0                                                                                                                               | 0  | 0  | 0   | 0 | 0  | 0   | 0   | 0  | 0 | 0 | 1  |
| No blast hit                                                                                                                    | 0  | 0  | 0   | 0 | 0  | 0   | 0   | 1  | 0 | 0 | 0  |
| 1                                                                                                                               | 0  | 0  | 0   | 0 | 0  | 0   | 1   | 0  | 0 | 0 | 0  |
| No blast hit                                                                                                                    | 0  | 0  | 0   | 0 | 0  | 0   | 15  | 0  | 0 | 0 | 0  |
| 0                                                                                                                               | 0  | 0  | 0   | 0 | 0  | 0   | 15  | 0  | 0 | 0 | 0  |
| No blast hit                                                                                                                    | 0  | 0  | 0   | 0 | 0  | 0   | 0   | 1  | 0 | 0 | 0  |
| 0                                                                                                                               | 0  | 0  | 0   | 0 | 0  | 0   | 0   | 1  | 0 | 0 | 0  |



|                   |   |   |   |   |   |   |   |    |   |   |   |   |
|-------------------|---|---|---|---|---|---|---|----|---|---|---|---|
| No blast hit<br>0 | 0 | 0 | 0 | 0 | 0 | 0 | 0 | 0  | 0 | 1 | 0 | 0 |
| No blast hit<br>2 | 0 | 0 | 0 | 0 | 0 | 0 | 0 | 0  | 2 | 3 | 0 | 0 |
| No blast hit<br>0 | 0 | 0 | 0 | 0 | 0 | 0 | 0 | 0  | 3 | 2 | 0 | 1 |
| No blast hit<br>0 | 1 | 0 | 0 | 0 | 0 | 0 | 0 | 1  | 0 | 0 | 0 | 0 |
| No blast hit<br>0 | 0 | 0 | 0 | 0 | 0 | 0 | 0 | 13 | 0 | 0 | 0 | 0 |
| No blast hit<br>0 | 0 | 0 | 0 | 0 | 0 | 0 | 0 | 0  | 0 | 0 | 0 | 1 |
| No blast hit<br>0 | 0 | 0 | 0 | 0 | 0 | 0 | 0 | 0  | 1 | 0 | 0 | 0 |
| No blast hit<br>1 | 0 | 0 | 0 | 0 | 0 | 0 | 0 | 0  | 0 | 0 | 0 | 0 |
| No blast hit<br>0 | 0 | 0 | 0 | 0 | 0 | 0 | 0 | 0  | 1 | 0 | 0 | 0 |
| No blast hit<br>0 | 0 | 0 | 0 | 0 | 0 | 0 | 0 | 0  | 1 | 0 | 0 | 0 |

Supplementary Table 3. Weighted Unifrac distances for all pairwise comparisons of lung and tracheal samples. Ex indicates the ex-plant lungs while PM indicates the post-mortem lungs.

|           | ExRUL | ExRML | ExRLL | ExLUL | ExLing | ExLLLA | ExLLLP | PMRUL | PMRML | PMRLL | PMLUL | PMLML | PMLLL | PMTrachea |
|-----------|-------|-------|-------|-------|--------|--------|--------|-------|-------|-------|-------|-------|-------|-----------|
| ExRUL     | 0.000 | 0.061 | 0.061 | 0.072 | 0.031  | 0.054  | 0.064  | 0.378 | 0.387 | 0.387 | 0.358 | 0.388 | 0.418 | 0.398     |
| ExRML     | 0.061 | 0.000 | 0.013 | 0.017 | 0.043  | 0.017  | 0.013  | 0.346 | 0.354 | 0.355 | 0.324 | 0.356 | 0.391 | 0.366     |
| ExRLL     | 0.061 | 0.013 | 0.000 | 0.022 | 0.044  | 0.016  | 0.011  | 0.347 | 0.356 | 0.356 | 0.325 | 0.356 | 0.391 | 0.367     |
| ExLUL     | 0.072 | 0.017 | 0.022 | 0.000 | 0.055  | 0.027  | 0.020  | 0.339 | 0.348 | 0.348 | 0.318 | 0.348 | 0.386 | 0.360     |
| ExLing    | 0.031 | 0.043 | 0.044 | 0.055 | 0.000  | 0.038  | 0.046  | 0.364 | 0.373 | 0.373 | 0.343 | 0.374 | 0.400 | 0.386     |
| ExLLLA    | 0.054 | 0.017 | 0.016 | 0.027 | 0.038  | 0.000  | 0.016  | 0.352 | 0.361 | 0.361 | 0.330 | 0.362 | 0.395 | 0.372     |
| ExLLLP    | 0.064 | 0.013 | 0.011 | 0.020 | 0.046  | 0.016  | 0.000  | 0.348 | 0.356 | 0.357 | 0.326 | 0.357 | 0.392 | 0.365     |
| PMRUL     | 0.378 | 0.346 | 0.347 | 0.339 | 0.364  | 0.352  | 0.348  | 0.000 | 0.033 | 0.033 | 0.040 | 0.062 | 0.147 | 0.056     |
| PMRML     | 0.387 | 0.354 | 0.356 | 0.348 | 0.373  | 0.361  | 0.356  | 0.033 | 0.000 | 0.006 | 0.068 | 0.090 | 0.162 | 0.025     |
| PMRLL     | 0.387 | 0.355 | 0.356 | 0.348 | 0.373  | 0.361  | 0.357  | 0.033 | 0.006 | 0.000 | 0.069 | 0.090 | 0.161 | 0.025     |
| PMLUL     | 0.358 | 0.324 | 0.325 | 0.318 | 0.343  | 0.330  | 0.326  | 0.040 | 0.068 | 0.069 | 0.000 | 0.061 | 0.160 | 0.091     |
| PMLML     | 0.388 | 0.356 | 0.356 | 0.348 | 0.374  | 0.362  | 0.357  | 0.062 | 0.090 | 0.090 | 0.061 | 0.000 | 0.168 | 0.112     |
| PMLLL     | 0.418 | 0.391 | 0.391 | 0.386 | 0.400  | 0.395  | 0.392  | 0.147 | 0.162 | 0.161 | 0.160 | 0.168 | 0.000 | 0.184     |
| PMTrachea | 0.398 | 0.366 | 0.367 | 0.360 | 0.386  | 0.372  | 0.365  | 0.056 | 0.025 | 0.025 | 0.091 | 0.112 | 0.184 | 0.000     |

Supplementary Figure 1. Rarefaction curves for microbial communities in the ex-plant (Ex) and post-mortem (PM) lung regions and the tracheal mucus plug.

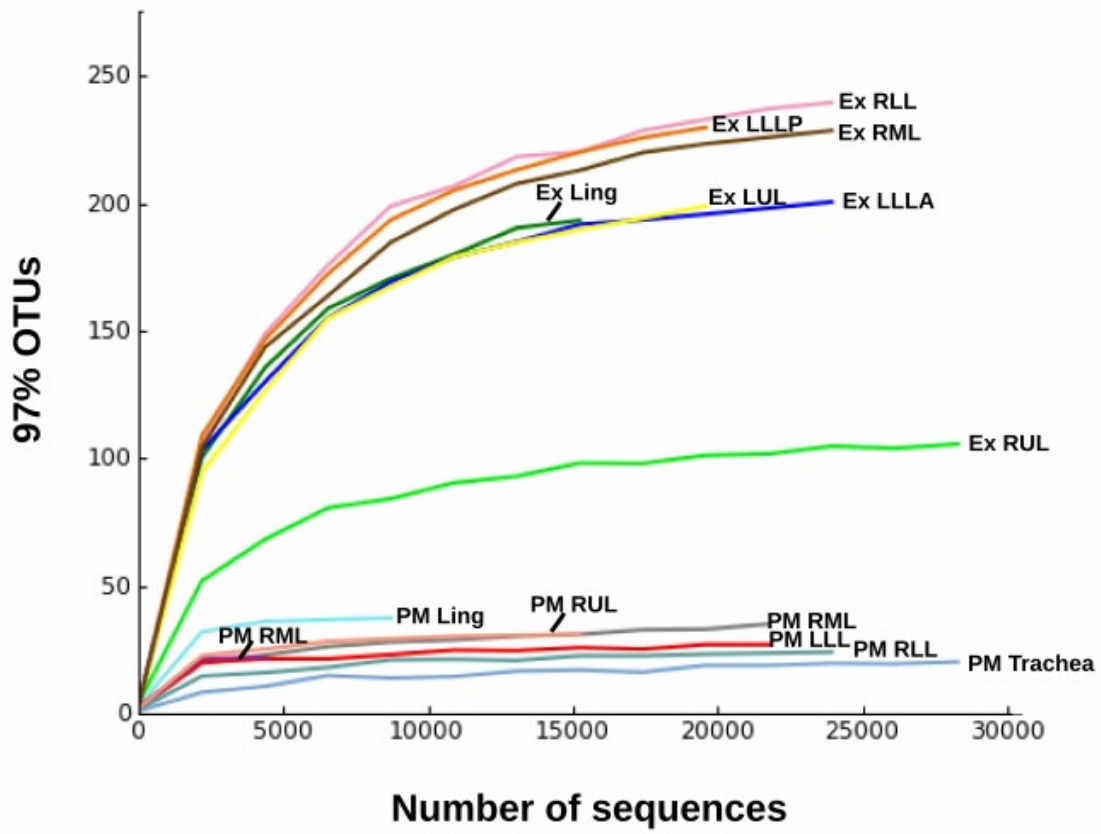

Supplement: ismej2011104x1.pdf [file ismej2011104x1.pdf]
